1 **Title:** The Pursuit of Pride: Outcomes achieved under Beliefs of Internal Control shape positive Affect and  
2 neural Dynamics in the vmPFC

3

4 **Authors:**

5 David S Stolz<sup>1</sup>, Laura Müller-Pinzler<sup>1</sup>, Sören Krach<sup>1</sup>, Frieder M Paulus<sup>1</sup>

6

7 **Affiliations:**

8 <sup>1</sup>Department of Psychiatry and Psychotherapy, Social Neuroscience Lab, University of Lübeck, Ratzeburger  
9 Allee 160, D-23538 Lübeck, Germany

10

11 **Email:**

12 David Sören Stolz david.stolz@uni-luebeck.de

13 Laura Müller-Pinzler laura.muellerpinzler@uni-luebeck.de

14 Sören Krach soeren.krach@uni-luebeck.de

15 Frieder Michel Paulus frieder.paulus@uni-luebeck.de

16

17 **Corresponding Authors:**

18 David S Stolz & Frieder M Paulus

19 Department of Psychiatry and Psychotherapy, Social Neuroscience Lab

20 University of Lübeck, Ratzeburger Allee 160, D-23538 Lübeck, Germany

21 Phone: +49 451 3101 7527

22

## Abstract

23

Experiencing events as controllable and attributing positive outcomes to own contributions is

24

essential for human well-being. Based on classic psychological theory we test how internal control beliefs

25

impact the affective valuation of task outcomes, neural dynamics and ensuing behavioral preferences. In

26

three consecutive studies with independent samples we show that dynamics in self-evaluative affect

27

specifically increase when agents believe they caused a given task outcome. We demonstrate that these

28

outcomes engage brain networks processing self-referential information in the cortical midline. Here,

29

activity in the ventromedial prefrontal cortex tracks outcome valence regarding both success as well as

30

internal control, and covaries with self-evaluative affect. These affective dynamics also relate to increased

31

functional coupling between the ventral striatum and cortical midline structures. Finally, we show that

32

self-evaluative affect promotes preferences for control, even at a monetary cost. Our investigations extend

33

recent models of positive affect and well-being, and emphasize that control beliefs drive intrinsic

34

motivation.

35

36

## Introduction

37           The subjective belief of being in control over events in one's life is essential for well-being<sup>1-3</sup>. The  
38 ways in which individuals perceive themselves or external forces as determining their fate has been  
39 conceptualized in the classic theory of locus of control<sup>4</sup> and since then has deeply influenced theory  
40 formation in psychology<sup>5-7</sup>. Here, the sense of being in control hinges on the subjective belief that the  
41 course of events can be shaped by own efforts and actions (i.e. internal control beliefs), creating the  
42 cognitive foundation of attributing their outcomes to the self. Internal control beliefs can determine  
43 whether individuals will show effort<sup>8</sup>, make career choices<sup>9</sup>, and are also more generally considered to be  
44 a protective factor for various psychiatric phenomena<sup>10-12</sup>. In contrast, the conviction of having no control  
45 and thus being at the mercy of chance or other forces in one's environment (i.e. external control beliefs)  
46 has been linked to learned helplessness and major depression<sup>13</sup>, a debilitating psychiatric condition that is  
47 characterized by attenuated affect, reduced levels of motivated behavior and diminished self-esteem<sup>14</sup>. In  
48 respect of this background, we aimed to investigate how contexts that foster the formation of internal  
49 control beliefs and self-attribution shape the affective valuation, neural processing, and motivational  
50 consequences of task outcomes.

51           Having opportunities to choose is a fundamental prerequisite of exerting control<sup>3</sup>. Choice  
52 opportunities allow to pick between options with different value<sup>15</sup>, and thus are a means for maximizing  
53 the probability of achieving desired outcomes, avoiding potential hazards, and reducing uncertainty<sup>16</sup>. The  
54 importance of exerting control over one's environment has stimulated the idea that having choices per se  
55 carries intrinsic value<sup>3</sup>. Studies have demonstrated that humans favor choice options that are followed by  
56 a second choice over those that are not<sup>17</sup>, or prefer tasks with more over those with fewer choice options<sup>18</sup>.  
57 Relatedly, humans prefer stimuli selected freely during a preceding task over those that a computer had  
58 selected for them, despite equal monetary value of the stimuli<sup>19</sup>. Prior neuroscience studies also support  
59 the notion that choices have intrinsic value. Precisely, cues signaling an upcoming choice are associated

60 with increased activity in the ventral striatum (VS)<sup>20,21</sup>, a region implicated in dopaminergic reward  
61 processing<sup>22–24</sup>.

62 Although having choices is the condition precedent for exerting control, the lynchpin of theory  
63 and empirical evidence relating control beliefs to well-being are self-related thoughts and subjective  
64 models of whether an outcome can be achieved due to the capabilities of the agent<sup>1,2,4,6</sup>. Thereby, the  
65 experience of control should increase if internal models of behavior are available that explain how actions  
66 – if executed correctly – yield a specific outcome<sup>25,26</sup>, in contrast to settings in which behavior is thought  
67 to be linked to its outcomes by chance alone<sup>20,21</sup>. One could consider skilled players in the game of darts  
68 who perform at a success rate of exactly 50% for hitting the bullseye. According to theory<sup>4</sup>, these players  
69 should to some extent experience internal control in a sense that they know they can shape the outcomes  
70 of the game, as their odds for hitting their target by far exceed those of a random thrower or less skilled  
71 player. Here, internal control beliefs set the cognitive foundation for being able to attribute the outcomes  
72 to own contributions and capabilities. However, when placing a bet on a color in a game of roulette, control  
73 beliefs should diminish as behavior and outcomes are linked only by chance even though outcome  
74 probabilities are similar to the previous example. Thus, while having choices is the condition necessary for  
75 exerting control, they are in principle not sufficient for experiencing control as implied by theory<sup>4,6,7</sup>. Only  
76 if the context offers internal control over outcomes, it is possible to attribute events to the self, own  
77 efforts, and abilities, with broad implications for self-related affect and motivation<sup>27,28</sup>.

78 Theories on self-conscious affect predict that control beliefs shift the valuation of outcomes and  
79 result in distinct patterns of affective experience<sup>29</sup>. Precisely, the attribution of outcomes to controllable  
80 and internal causes is a necessary condition for the experience of the self-conscious affect of pride<sup>27</sup>. The  
81 concept of pride essentially hinges on a subjective model of control – the belief that an outcome was  
82 caused by one’s own actions – resulting in self-approval in case the event is relevant for personal goals<sup>30,31</sup>.  
83 Pride experiences thus underlie self-esteem<sup>32</sup>, foster intrinsic motivation<sup>28</sup>, and mediate the contribution  
84 of internal control beliefs to well-being<sup>2,32</sup>. In contrast, positive events caused by uncontrollable factors

85 such as winning a lottery also drive affective dynamics such as momentary happiness<sup>33,34</sup>, but do not have  
86 similar consequences in terms of self-relevance and motivation<sup>28</sup>. In this line, earnings that have been  
87 obtained through own efforts and labor are valued more than windfall gains<sup>35</sup>, thereby contributing to the  
88 effort paradox that the value of effort sometimes exceeds its costs<sup>36</sup>.

89 In the present study we test how the affective valuation of outcomes varies according to how  
90 much a task allows for developing internal control beliefs and self-attribution, how this relates to shifts in  
91 neural processing of objectively similar task outcomes and we finally provide evidence that the subjective  
92 value of tasks with a high degree of control is related to the dynamics of self-evaluative affect. To do so,  
93 we introduce a novel paradigm that in addition to mere choice<sup>20</sup> extends the concept of control to an  
94 experimental condition allowing subjects to attribute task outcomes to their own performance<sup>26</sup>, while  
95 strictly controlling outcome probabilities. This is a key step since with increasing control beliefs, outcomes  
96 also get more predictable and less uncertain in everyday life<sup>6,7,37,38</sup>.

97 As predicted by theory, affective and especially pride dynamics should be most strongly modulated  
98 by outcomes if these are perceived to depend on one's own behavior. Aside from the ventral striatum,  
99 prior evidence suggests the ventromedial prefrontal cortex (vmPFC) to be a key cortical interface for  
100 integrating self-attribution during outcome valuation. The vmPFC has extensive connections with the  
101 ventral tegmental area, the amygdala and the striatum<sup>39,40</sup>, is associated with domain general  
102 computations of value<sup>15,41</sup> and has been linked to behavioral control and persistence in the face of failure<sup>42-</sup>  
103 <sup>44</sup>. Further, the vmPFC belongs to structures of the cortical midline implicated in self-related processing  
104 (CMS)<sup>45,46</sup>. Specifically, the vmPFC has been associated with the generation of affective meaning<sup>47,48</sup>, the  
105 value of revealing information about the self<sup>49</sup>, and updating of self-esteem and self-relevant optimistic  
106 beliefs<sup>50,51</sup>. These findings suggest the vmPFC to serve a central function for the self-relevance of task  
107 outcomes under varying levels of control and associated self-related affective dynamics.

108 In order to manipulate internal control beliefs and investigate its impact on affective, neural, and  
109 motivational dynamics, we present a series of three consecutive experiments with independent samples

110 (total  $N=129$ ). In a novel paradigm we systematically manipulate control beliefs beyond having a choice or  
111 not, inducing low, medium, and high levels of perceived control (LC, MC, HC) via, respectively, a non-choice  
112 task, a choice task, and a skill-based task that allows attributing outcomes to the self. In principle, the  
113 choice and the non-choice task are gambles, while the skill-based task suggests participants to outperform  
114 chance level and having the capabilities needed to discriminate basic stimulus properties. This should  
115 imply that participants develop different degrees of control beliefs across conditions. Across all three  
116 conditions, rates of successes (WIN) and non-successes (noWIN) are kept at 50% (see figure 1). In study 1  
117 we test whether affective responses to outcomes depend on internal control beliefs as predicted by  
118 theory. In study 2, we replicate and extend study 1 by characterizing affective and neural dynamics in  
119 response to outcomes obtained at different levels of internal control during task execution. We focus our  
120 analyses on brain regions processing reward value and self-referential processes, specifically the vmPFC.  
121 As a last step, in study 3 we predict the subjective value controllable environments based on the dynamics  
122 of self-related positive affect by introducing an adaptive preference task. Our results support the broad  
123 impact of internal control beliefs on affect, motivated behavior and underlying brain function. We find  
124 that the value of control is associated with self-related affective responses and may even outweigh a  
125 monetary detriment entailed by preferences for control.  
126

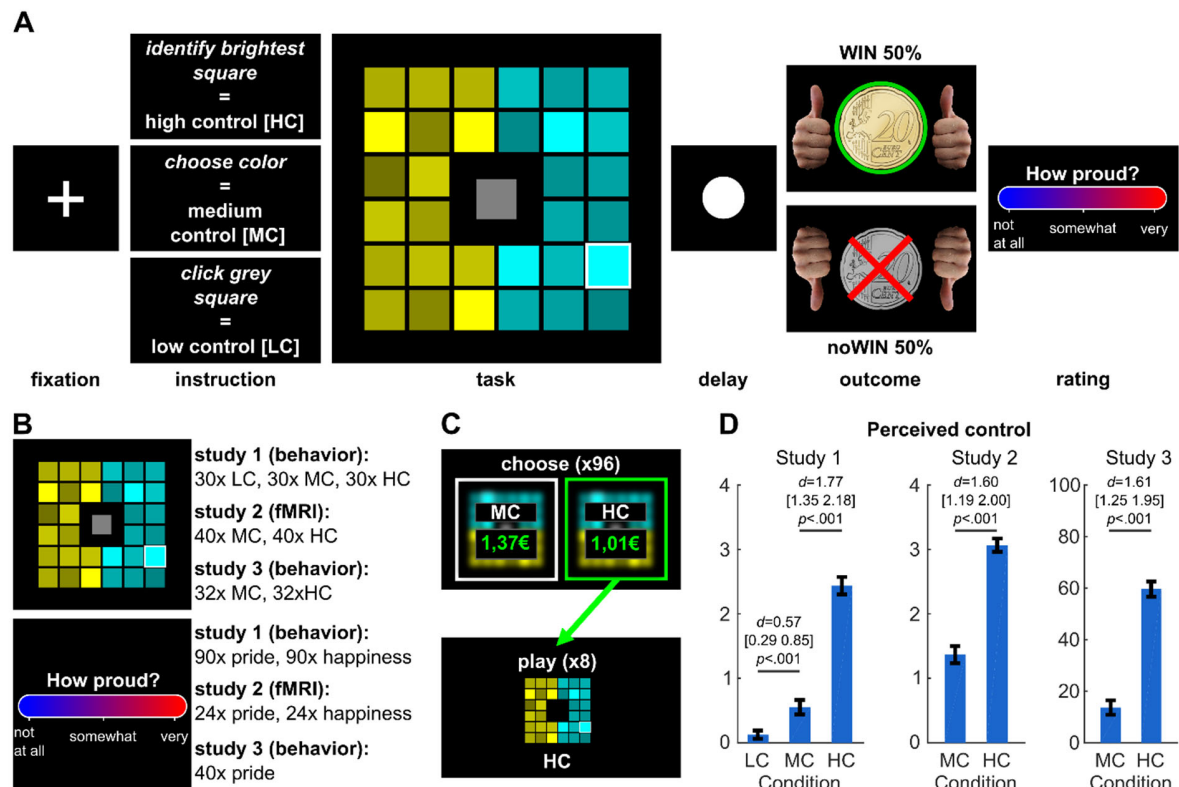

**Figure 1.** Overview about the experimental paradigm and the three studies. **A** Trial structure of the task. A fixation cross was followed by a cue indicating that the participant has to find the brightest square within either turquoise or yellow (high control, HC), choose between yellow and turquoise (medium control, MC), or play a gamble by clicking on the grey square in the middle (low control, LC; only presented in study 1). After the cue, the task grid occurred and was followed by a delay and task outcomes. Pride and happiness ratings regarding the preceding outcome were presented after the outcome phase. **B** Overview of the three studies. The task was presented in each study with varying numbers of trials and conditions. **C** In study 3, after the main task, 96 trials of a choice task were presented. The choice options offered to play either HC or MC with adaptively changing amounts of money determined using a staircase algorithm. Participants were informed that some of the chosen options would be actually presented and that the associated monetary gain would be awarded at the end of the experiment. **D** Internal control belief ratings for each study ('How much could you influence the outcome of the task').  $d$  = Cohen's  $d$ . Values in brackets represent lower and upper bounds of 90% confidence intervals. HC=high control. MC=medium control. LC=low control. Error bars are +/- 1 standard error of the mean.

127

128

129

130

131

## Results

### 132 **Study 1: Dynamics of Self-Evaluative Positive Affect**

133 Study 1 manipulated levels of internal control beliefs above and beyond having a choice or not. In  
134 brief, we presented participants ( $N=40$ ) with a grid of one centered grey square and 32 surrounding  
135 squares that were separated into two parts of shaded colors (see figure 1). This allowed to implement  
136 three different conditions that were pseudorandomly presented and cued before each trial. On the lowest  
137 level of control, successes (WIN outcomes; 0.20 €) and non-successes (noWIN outcomes; 0.00 €) depended  
138 on an automated gamble which was initiated by clicking on the grey square (low control, LC; see figure 1).  
139 On the medium level of control beliefs, WIN and noWIN outcomes allegedly depended on the correct  
140 choice between the two colors (medium control, MC). On the highest level of internal control, WIN and  
141 noWIN outcomes depended on whether subjects were able to identify the brightest square within the  
142 shades of one color (high control, HC). Unknown to the participants, across all three conditions outcome  
143 probabilities were held constant at 50% by predefined feedback and participant learned that their hit rate  
144 was 50% on average in the HC condition (see methods for details). Each condition was presented 30 times,  
145 i.e. a total of ninety trials was presented, and ratings of both pride and happiness were acquired after each  
146 outcome. After completion of the experimental tasks, subjects rated their control beliefs together with  
147 subjective experience of outcome probabilities for the different conditions.

148 Subjects experienced the HC condition as more controllable than the other conditions (main effect  
149 of condition:  $F(1.74, 76.72)=133.97$ ,  $p<.001$ ; planned comparisons: HC>MC:  $t(39)=11.21$ ,  $p<.001$ ,  $d=1.77$ ,  
150 90% CI=[1.35; 2.18]; MC>LC:  $t(39)=3.60$ ,  $p<.001$   $d=0.57$ , 90% CI=[0.29; 0.85]; Bonferroni-corrected for



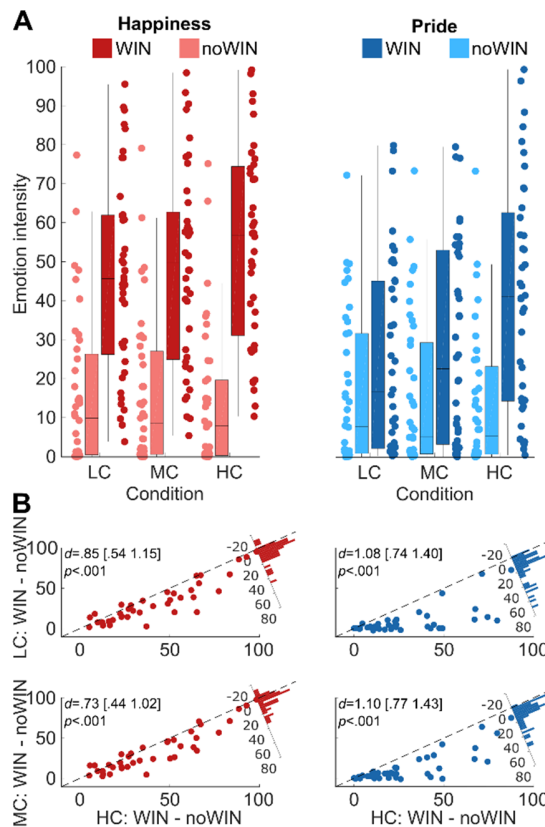

**Figure 2.** Task effects on emotion ratings in study 1 **A** Emotion ratings from study 1, separate for pride and happiness, high, medium and low control as well as outcome valence. **B** Scatterplots depict reactivity to WIN vs noWIN outcomes for happiness (left) and pride (right) in dependence of perceived control (x-axis: HC; y-axis (top): LC; y-axis (bottom): MC). Top and bottom rows depict relationships between emotion reactivity in LC and HC, as well as MC and HC, respectively. Histograms in top right corners visualize the differences in emotion reactivity between HC and LC (top row), or HC and MC (bottom row). HC=high control. MC=medium control. LC=low control.  $d$ =Cohen's  $d$ . Values in brackets represent 90% confidence intervals for  $d$ .

151 multiple comparisons, one-sided). As predicted by theory, the dynamics in the pride experiences induced  
 152 by succeeding (WIN vs noWIN) depended more strongly on the task than it was the case for happiness  
 153 ratings (condition\**affect*\*outcome valence:  $F(1.29,50.10)=11.44$ ,  $p < .001$ ,  $\eta_p^2=.23$ ; figure 2, for full  
 154 rANOVA effects, see Supplement 1 – table S1). Paired comparisons showed that affect ratings were  
 155 higher for WIN than for noWIN outcomes for both happiness (LC:  $t(39)=7.85$ ,  $p < .001$ ; MC:  $t(39)=8.16$ ,  
 156  $p < .001$ ; HC:  $t(39)=9.74$ ,  $p < .001$ ) and pride (LC:  $t(39)=3.29$ ,  $p < .001$ ; MC:  $t(39)=4.41$ ,  $p < .001$ ; HC:  $t(39)=7.37$ ,  
 157  $p < .001$ , all  $p$ -values one-sided and Bonferroni-corrected for multiple comparisons). These differences were  
 158 larger in HC than in MC (pride:  $t(39)=6.97$ , one-sided  $p < .001$ ; happiness:  $t(39)=4.64$ , two-sided  $p < .001$ ),  
 159 and larger in MC than in LC for pride ( $t(39)=3.03$ , one-sided  $p = .013$ ), but not happiness ( $t(39)=2.24$ , two-  
 160 sided  $p = .093$ , corrected), showing that internal control beliefs drive affective dynamics in general.  
 161 Importantly, the pride response (i.e. the difference [HC:WIN-HC:noWIN]-[MC:WIN-MC:noWIN]) increased  
 162 more strongly from MC to HC than the happiness response ( $t(39)=3.69$ , one-sided  $p < .001$ ), while no

163 difference was found when comparing pride and happiness responses between LC and MC ( $t(39)=1.57$ ,  
164 one-sided  $p=.124$ , corrected). These findings demonstrate that control beliefs depend on contexts in which  
165 behavior can be guided by subjective models that explain how outcomes can be achieved through own  
166 actions and the observed performance can only be achieved by a certain degree of mastering the task. If  
167 such self-attribution is possible, internal control increases beyond having a choice or not, effectively  
168 increasing the self-relevance of outcomes and changing their affective valuation, driving pride more  
169 strongly than happiness<sup>27</sup>. In contrast, merely having a choice may be rewarding in itself<sup>20</sup>, but falls short  
170 of internal control beliefs as defined in classic theories and has little impact on self-evaluative affect.

171

## 172 **Study 2: Neural Foundations of Outcome Valuation in the Context of Internal Control**

173 In study 2 we replicated and extended study 1 by characterizing the neural processing of outcomes  
174 achieved under internal control and their impact on affective dynamics. Subjects ( $N=39$ ) underwent fMRI  
175 scanning while performing the identical MC and HC conditions from study 1, which there showed the  
176 strongest modulation of affect and are most relevant for developing theory and the neuroscience of  
177 control beliefs. A total of 80 trials were presented, with ratings of either pride or happiness (24 each)  
178 acquired after every second to third outcome.

179 **Dynamics of self-evaluative positive Affect.** The results of study 2 replicated those of study 1  
180 (figure 3). Subjects experienced much higher internal control in HC than in MC (paired-sample t-tests:  
181  $t(37)=9.85$ ,  $p<.001$ ,  $d=1.60$ , 90%  $CI=[1.19; 2.00]$ ), and affect ratings differed between tasks with different  
182 levels of control (rmANOVA: main effect of condition:  $F(1,38)=8.38$ ,  $p=.006$ ,  $\eta_p^2=.18$ ). Comparably to study  
183 1, pride responses to task outcomes differed from those for happiness in dependence of control beliefs  
184 (condition\*outcome valence\*affect:  $F(1,38)=9.08$ ,  $p=.005$ ,  $\eta_p^2=.19$ ). As before, we computed the affective  
185 responses separately for pride and happiness ([HC:WIN–HC:noWIN] – [MC:WIN–MC:noWIN]). The  
186 resulting pride response was significantly larger than the happiness response ( $t(38)=3.01$ , one-sided

187  $p=.005$ ), emphasizing how self-related positive affect hinges on the subjective belief that outcomes  
 188 depend on one's own actions (for full rmANOVA effects, see Supplement 1 – table S2).

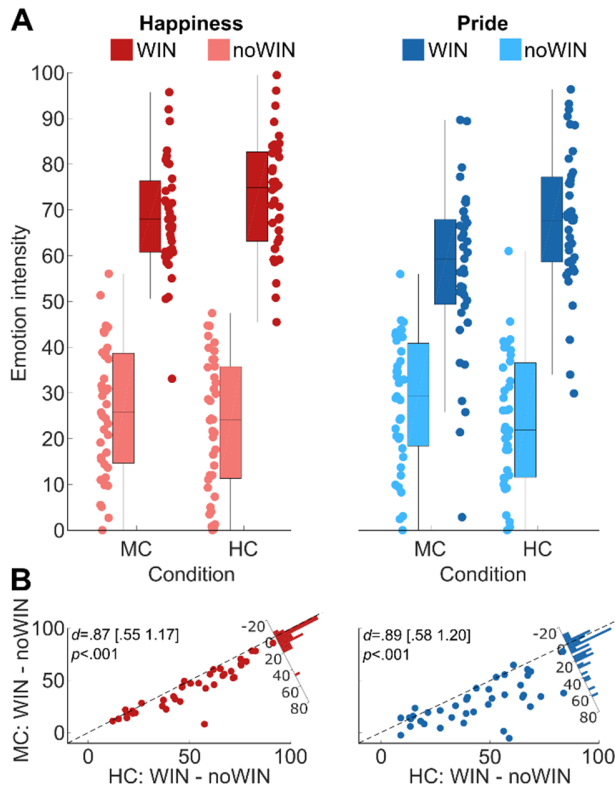

**Figure 3.** Task effects on emotion ratings in study 2 **A** Emotion ratings from study 2, separate for pride and happiness, high and medium control as well as outcome valence. **B** Scatterplots depict reactivity to WIN vs noWIN outcomes for happiness (left) and pride (right) in dependence of internal control condition (x-axis: HC; y-axis: MC). Histograms in top right corners visualize the differences in emotion reactivity between HC and MC. HC=high control. MC=medium control.  $d$ =Cohen's  $d$ . Values in brackets represent 90% confidence intervals

189

190 **Neural Responses to Outcomes in the Context of Internal Control.** Receiving a positive outcome

191 (WIN>noWIN) yielded significant activations in regions associated with processing of value (as indicated

192 by ROI-analyses using the VALUE-SELF mask, covering areas associated with the term “value”, but not

193 “self-referential”; created using Neurosynth<sup>52</sup>; see methods). Specifically, we observed significant

194 activation with peaks in bilateral ventral striatum (VS; left:  $x,y,z$  (mm): -14,8,-10,  $t(114)=8.18$ ;  $Z=7.24$ ,

195  $k=235$ ; right: 16,4,-12,  $t(114)=7.69$ ;  $Z=6.89$ ,  $k=233$ ; all coordinates in MNI space), anterior cingulate cortex

196 (ACC; -2,44,-6,  $t(114)=6.71$ ;  $Z=6.15$ ,  $k=108$ ), superior medial frontal gyrus (-2,58,0,  $t(114)=8.14$ ;  $Z=7.21$ ,

197  $k=61$ ), and vmPFC (4,48,-2,  $t(114)=5.59$ ;  $Z=5.24$ ,  $k=12$ ; all  $p$ -values  $<.05$ , FWE-corrected within the

198 VALUE-SELF mask; for whole-brain effects see Supplement 2).

199 Receiving outcomes attributable to one’s own actions (HC>MC) yielded significant activations in  
 200 CMS (ROI-analysis using the SELF-VALUE mask, covering regions associated with the term “self-  
 201 referential” but not “value”), with peaks in left vmPFC (-8,50,-12,  $t(114)=6.34$ ;  $Z=5.85$ ,  $k=27$ ), and left ACC  
 202 (-2,38,4,  $t(114)=6.27$ ;  $Z=5.80$ ,  $k=108$ ). In addition, this contrast yielded significant effects in posterior CMS,  
 203 specifically the left cuneus (-8,-58,20,  $t(114)=6.61$ ;  $Z=6.07$ ,  $k=208$ ), extending to precuneus (-6,-50,6,  
 204  $t(114)=5.60$ ;  $Z=5.25$ ,  $k=14$ ; all  $p$ -values  $<.05$ , small-volume FWE-corrected). These findings indicate, that,  
 205 as hypothesized, cortical regions associated with processing of self-relevant information are engaged  
 206 when outcomes are obtained in task environments that are perceived as controllable and thus provide  
 207 information about the subjects’ capabilities<sup>31,53</sup>.

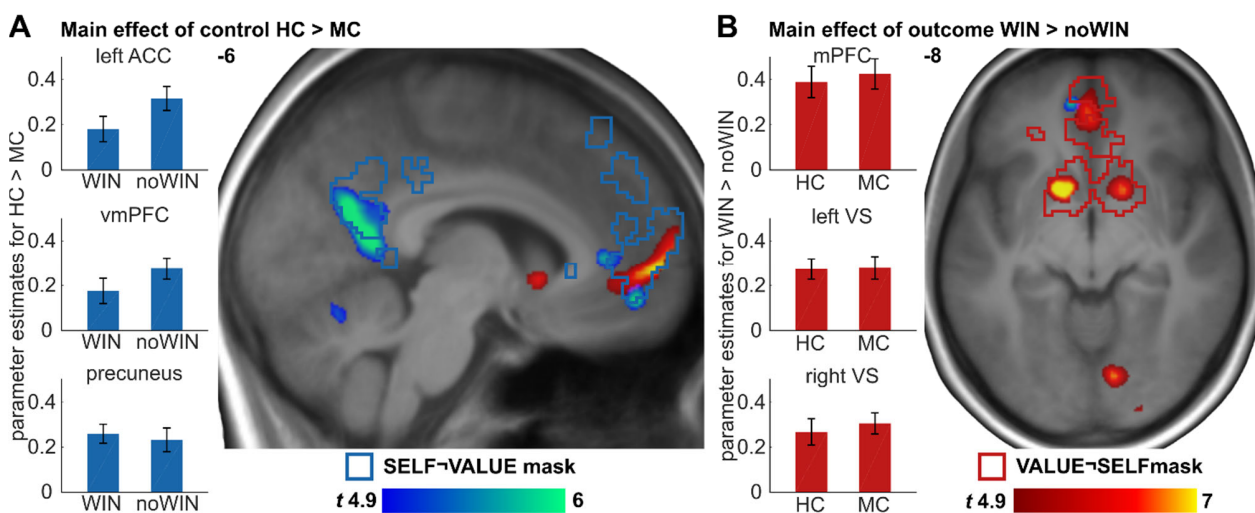

**Figure 4.** BOLD effects of the MRI task. **A** HC>MC (blue-green) and **B** WIN>noWIN (red-yellow) displayed at  $p<.05$ , whole-brain FWE-corrected. Blue and red outlines represent masks for SELF-VALUE and VALUE-SELF, respectively. Bar plots on the left represent average effects across participants for all voxels inside HC>MC clusters. Bar plots on the right depict average effects across participants for all voxels inside WIN>noWIN clusters. Error bars are  $\pm 1$  standard error of the mean.

208 Next, we were interested in the additive effects of internal control and winning, by describing  
 209 specific neural correlates of receiving positive outcomes under high control beliefs (three-way conjunction  
 210 of [HC:WIN>HC:noWIN]  $\cap$  [HC:WIN>MC:WIN]  $\cap$  [HC:WIN>MC:noWIN]; figure 5). This analysis revealed  
 211 that the left vmPFC, specifically, is more strongly engaged when subjects’ successes are attributable to  
 212 their own actions (-4,48,-10,  $t(114)=3.45$ ;  $Z=3.36$ ,  $k=11$ ,  $p=.023$ , FWE-corrected within the SELF $\cap$ VALUE  
 213 mask, covering regions associated with both “self-referential” and “value”). The additivity of the effect in

214 this region is illustrated by the common of responses to winning (WIN>noWIN: -2,48,-4,  $t(114)=7.60$ ;  
 215  $Z=6.82$ ,  $k=193$ ;  $p<.05$ , FWE-corrected) as well as task controllability (HC>MC; -8,48,-12,  $t(114)=6.13$ ;  
 216  $Z=5.69$ ,  $k=162$ ,  $p<.05$ , small-volume FWE-corrected). The localization of this effect thus mirrors how the  
 217 processing of value and self-reference converges in the vmPFC<sup>51,54</sup>.

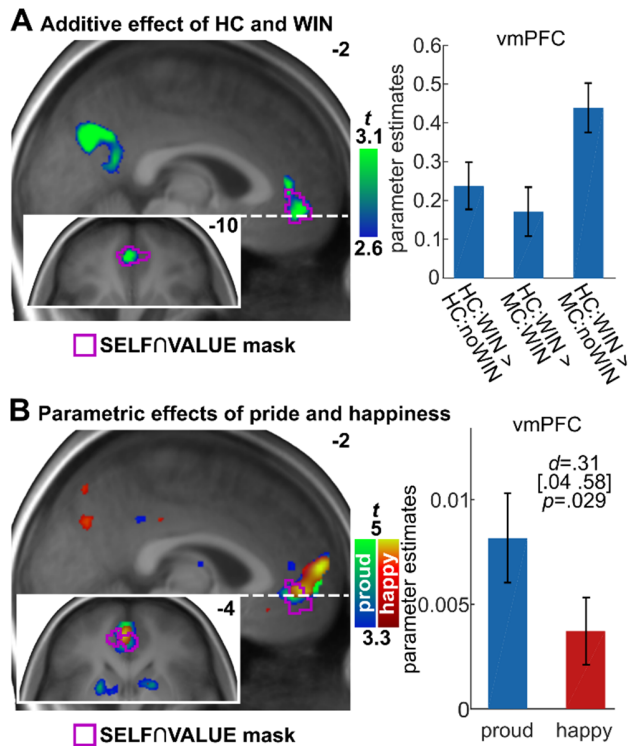

**Figure 5.** Additive effect of winning under high control and parametric effects of emotion ratings. **A** Activations show the specific effect of HC:WIN (i.e. 3-way conjunction [HC:WIN>HC:noWIN]  $\cap$  [HC:WIN>MC:WIN]  $\cap$  [HC:WIN>MC:noWIN]), displayed at  $p<.005$ , uncorrected. The conjunction contrast survived small-volume FWE-correction at  $p<.05$  inside the SELF $\cap$ VALUE mask in vmPFC. Bar plot represents differences of neural activation in vmPFC between HC:WIN and the other three outcomes. **B** Parametric modulation effect of happiness (red-yellow) and pride ratings (blue-green) at outcome presentation, displayed at  $p<.001$ , uncorrected for illustrative purposes. Bar plot shows group-level parameter estimates of the parametric modulations, averaged across all voxels inside the SELF $\cap$ VALUE mask. Violet outlines show SELF $\cap$ VALUE mask. Error bars are  $\pm 1$  standard error of the mean.  $d$ =Cohen's  $d$ . Values in brackets are lower and upper bound of 90% confidence interval for  $d$ .

218

219 **Neural Correlates of self-evaluative Affect.** We next aimed to link BOLD responses of task  
 220 outcomes to intra-individual dynamics in the experiences of pride and happiness (figure 5). We found that  
 221 within-subject dynamics in happiness were significantly correlated with neural activity within the  
 222 VALUE $\rightarrow$ SELF mask at outcome presentation (16,2,-12,  $t(38)=4.55$ ,  $Z=4.04$ ,  $k=3$ ,  $p=.022$ ), as well as the  
 223 SELF $\cap$ VALUE mask (left vmPFC; -2,48,-4,  $t(38)=4.60$ ,  $Z=4.08$ ,  $k=47$ ,  $p=.002$ ). Within-subject variability in  
 224 pride ratings showed more extended significant effects in the SELF $\rightarrow$ VALUE mask (dorsal medial prefrontal  
 225 cortex dmPFC; -2,56,2,  $t(38)=5.96$ ,  $Z=4.98$ ,  $k=122$ ,  $p=.001$ ) and the VALUE $\rightarrow$ SELF mask (dmPFC; -2,56,0,  
 226  $t(38)=6.15$ ,  $Z=5.09$ ,  $k=22$ ,  $p<.001$ ). In addition, variability in pride ratings correlated significantly with BOLD

227 responses in the SELF $\cap$ VALUE mask (left vmPFC; -4,48,-6,  $t(38)=4.83$ ,  $Z=4.24$ ,  $k=94$ ,  $p=.001$ ; all  $p$ -values  
228 small-volume FWE-corrected; see Supplements 2). Notably, pride ratings covaried more strongly with  
229 neural activity in vmPFC than happiness ratings (paired-sample t-test on mean beta estimates for all voxels  
230 inside the SELF $\cap$ VALUE mask:  $t(38)=1.951$ , one-sided  $p=.029$ ,  $d=.31$ ,  $CI=[.04 .58]$ ), indicating that neural  
231 activity in vmPFC is more strongly linked to affective experience when the causes of such experiences allow  
232 self-evaluation and might bear implications for one's future behavior<sup>27,48</sup>.

### 233 **Dynamics of striatal Connectivity in the Context of Internal Control over Outcomes.**

234 Psychophysiological interaction (PPI) analysis showed that when task outcomes were received in the HC  
235 condition, functional connectivity increased between the left VS and left vmPFC (6,48,-14,  $t(37)=3.80$ ;  
236  $Z=3.47$ ,  $k=48$ ,  $p=.017$ ; small-volume-corrected within the SELF $\cap$ VALUE mask). Though much more spatially  
237 extended in the CMS, this effect partly converged with the additive effects of success and control beliefs  
238 reported above. Beyond that, the left VS BOLD signal was more strongly associated with responses in the  
239 left angular gyrus (left AG) during outcome presentation in the HC as compared to the MC condition (-46,-  
240 70,38,  $t(37)=5.64$ ;  $Z=4.76$ ,  $k=24$ ,  $p=.001$  small-volume FWE-corrected inside the SELF $\rightarrow$ VALUE mask,  
241 surviving whole brain FWE-correction: -44,-70,40,  $t(37)=5.67$ ,  $Z=4.78$ ,  $p=.035$ ). The equivalent analyses for  
242 the right VS showed significant effects in left superior frontal gyrus (-18,38,46,  $t(38)=4.59$ ;  $Z=4.07$ ,  $k=4$ ,  
243  $p=.028$ , small-volume FWE-corrected inside the SELF $\rightarrow$ VALUE mask), but not in vmPFC (4,38,-4,  $t(38)=3.23$ ;  
244  $Z=3.02$ ,  $p=.069$ , small-volume FWE-corrected inside the SELF $\cap$ VALUE mask). At a more lenient exploratory  
245 threshold, for both left and right VS, we observed spatially extended connectivity changes in regions  
246 covered by the SELF $\rightarrow$ VALUE and SELF $\cap$ VALUE masks, such as the left AG, the dmPFC, ACC, and the vmPFC  
247 ( $p<.001$ ; see Supplement 2). These findings align with the notion that outcome-related information  
248 processed in regions such as the ventral striatum<sup>24</sup> are more strongly integrated with self-related  
249 representations in contexts with internal control, allowing to relate one's own actions to ensuing  
250 outcomes.

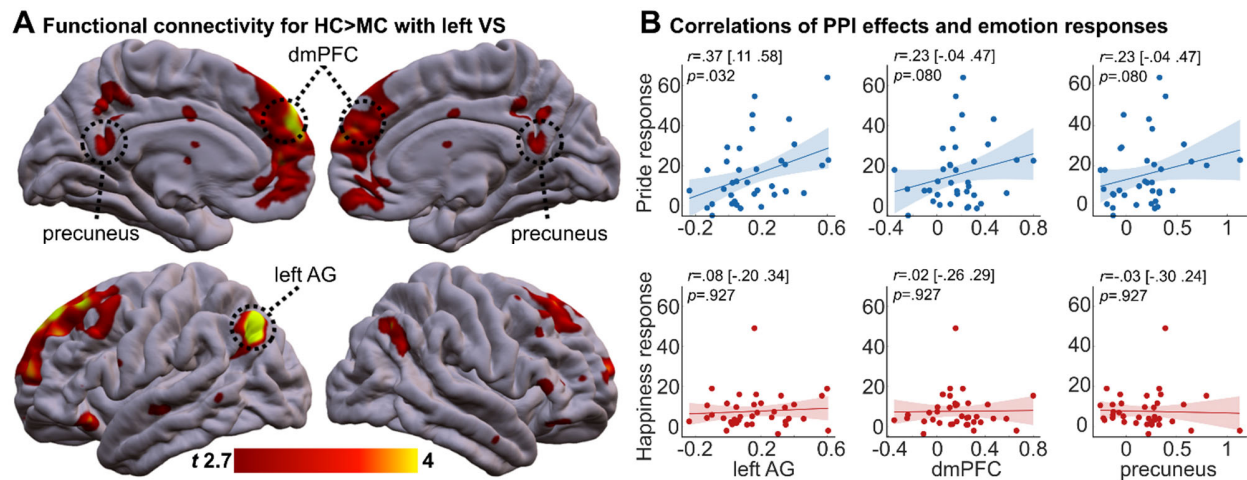

**Figure 6.** Increased functional connectivity with left VS in response to outcomes obtained under high subjectively perceived control tasks. **A** ROI analysis showed increased coupling between left VS and the left AG, the dmPFC and precuneus (small-volume FWE-corrected at  $p < .05$ ). Effects in are displayed at  $p < .005$ , whole-brain, for illustrative purposes. See Supplement 2 for full connectivity coordinates. **B Top** Bivariate correlations between pride response (i.e. [HC:WIN - HC:noWIN] - [MC:WIN - MC:noWIN]) and estimates of functional connectivity from left AG, dmPFC and precuneus. Eigenvariates of clusters within the SELF-VALUE mask consisting of voxels showing significantly increased functional connectivity with VS at  $p < .0005$  (uncorrected) were computed for the three regions highlighted in A.  $p$ -values are one sided and false-discovery-rate corrected. **Bottom** Analyses for happiness response equivalent to the ones performed for pride ratings.  $r$  = Pearson correlation coefficient. Values in brackets are 90% confidence intervals and shaded areas represent 95% confidence intervals.

251 Based on the assumption that stronger integration of self- and outcome-related processing should  
 252 relate to more pronounced pride responses, we performed additional exploratory analyses on the  
 253 connectivity dynamics induced by contexts of internal control beliefs. These showed that the observed  
 254 increases of connectivity with the VS correlated significantly with the behaviorally measured pride  
 255 response, at least in the left AG ( $r=.37$ ,  $p=.032$ ; dmPFC:  $r=.23$ ,  $p=.080$ ; precuneus:  $r=.23$ ,  $p=.080$ , FDR-  
 256 corrected one-sided  $p$ -values; figure 6, see methods for details). This implies that pride dynamics relate to  
 257 changes in functional coupling of the VS with brain regions associated with self-referential processes. The  
 258 equivalent analyses for the happiness response did not show any significant effects (left AG:  $r=.08$ ,  $p=.582$ ;  
 259 dmPFC:  $r=.02$ ,  $p=.582$ ; precuneus:  $r=-.03$ ,  $p=.582$ ; FDR-corrected one-sided  $p$ -values). However, we note  
 260 that these correlations did not differ significantly between pride and happiness (left AG: Hotelling's  $t(35)$   
 261 = 1.84,  $p=.088$ ; dmPFC: Hotelling's  $t(35) = 1.29$ ,  $p=.102$ ; precuneus: Hotelling's  $t(35) = 1.60$ ,  $p=.088$ ; FDR-  
 262 corrected one-sided  $p$ -values). While general positive affect has recently been shown to relate to neural

263 activity also elicited by surprising and uncontrollable task outcomes<sup>33,34</sup> these data demonstrate that  
264 positive affect is also considerably shaped by perceived control over task outcomes. Precisely, internal  
265 control beliefs increase self-relevance of task outcomes, driving activity in CMS and dynamics of self-  
266 related affect upon outcome reception<sup>31,53,54</sup>. These shifts in affective and neural dynamics effectively  
267 display as increased reports of pride experiences<sup>55</sup>, which relate to activity in the vmPFC as shown above  
268 and are assumed to bear implications for future behavior<sup>31,48</sup>.

269

### 270 **Study 3: Pride as an Affective Marker for the Subjective Value of Control**

271 In study 3 we aimed to predict behavior based on affective experiences of pride in high control  
272 environments. We show that participants' preference for controllable tasks is related to their pride  
273 response, even at a monetary cost. Subjects ( $N=50$ ) completed a total of 64 trials of MC and HC (32 each),  
274 with pride ratings acquired after 40 outcome presentations. Following the task presented in study 2  
275 (hereafter: the main task), we subsequently assessed whether subjects preferred HC or MC when different  
276 monetary amounts were offered. We employed an adaptive staircase algorithm<sup>56</sup> thus varying the offers  
277 presented for HC and MC on every trial in a fashion allowing to identify each subject's decision point. To  
278 increase the relevance of the task, subjects were informed that at random intervals some trials were going  
279 to be executed right after their choice. The chosen option, i.e. HC or MC with the associated potential  
280 payoffs, could then be played and the sum earned through successful task completion was awarded at the  
281 end of the experiment. Eight trials were pseudorandomly selected and presented to the subjects after the  
282 respective choice, however without the presentation of task outcomes.



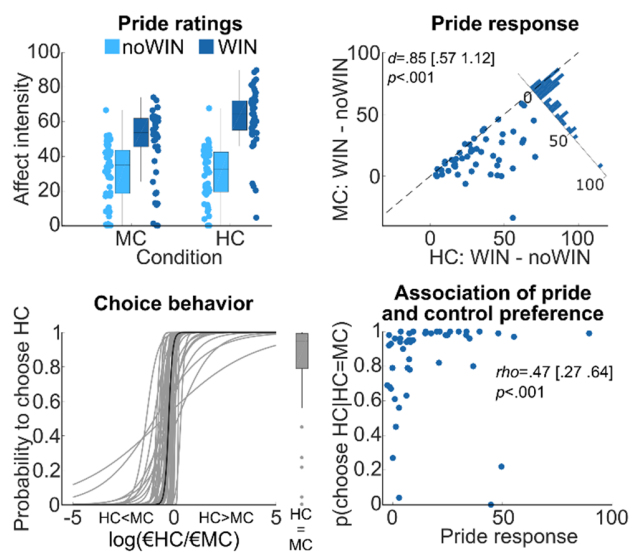

**Figure 7.** The experience of pride in response to high control affects subjective value of choices. **Top left** Pride ratings for study 3, separate for high and low control, as well as outcome valence. **Top right** Pride reactivity to WIN vs noWIN outcomes, separately for HC (x-axis) and MC (y-axis). Histogram depicts difference between HC and MC.  $d$ =Cohen's  $d$ . Values in brackets represent lower and upper bound of 90% confidence interval for  $d$ . **Bottom left** Probability to choose HC in choice task of study 3 as a logistic function of log-transformed relative option values ( $\log(\epsilon_{HC}/\epsilon_{MC})$ ). More positive values on horizontal axis indicate higher monetary value of HC relative to MC. Thin grey lines represent individual participants' choice functions. Thick black line represents hypothetical choice behavior based on sample medians for  $\beta_0$  and  $\beta_1$ . Boxplot represents

participant' probabilities to choose HC, given that both options have equal values. **Bottom right** Relationship of pride response and choice behavior in study 3.  $\rho$ =Spearman's  $\rho$ . Values in brackets are lower and upper bound of 90% confidence interval for  $\rho$ .

283 Confirming studies 1 and 2, subjects experienced increased internal control in HC than in MC  
 284 ( $t(49)=11.35$ ,  $p<.001$ ,  $d=1.61$ , 90%  $CI=[1.25; 1.95]$ ). Again, pride reactivity to outcomes differed between  
 285 HC and MC (condition\*outcome valence:  $F(1,49)=35.98$ ,  $p<.001$ ,  $\eta_p^2=.42$ ; figure 7). Specifically, pride was  
 286 rated higher for WIN than for noWIN outcomes (MC:  $t(49)=7.15$ , one-sided  $p<.001$ ; HC:  $t(49)=12.37$ , one-  
 287 sided  $p<.001$ , Bonferroni-corrected for multiple comparisons). In addition, the difference in affect ratings  
 288 between WIN and noWIN outcomes was larger in the HC condition than in the MC condition ( $t(49)=6.00$ ,  
 289 one-sided  $p<.001$ ; see Supplement 1 – table S3).

290 In the choice task, the mean percentage of choices in favor of the HC option was 58.1%  
 291 ( $SD=10.2\%$ ), which was significantly higher than chance ( $t(49)=5.62$ , one-sided  $p<.001$ ). The mean value of  
 292 the chosen MC options was 1.19€ ( $SD=.09\text{€}$ ) and that of the chosen HC options was 1.03€ ( $SD=.07\text{€}$ ; paired  
 293  $t$ -test:  $t(49)=8.20$ , one-sided  $p<.001$ ), indicating that participants had a preference for the HC task, despite  
 294 having a 13.4% smaller payoff than for the MC options.

295 In order to better characterize the choice behavior, we assessed the model parameters of a logistic  
 296 choice model fit to each participant's data (see methods). Across participants, the mean value of the

297 models intercept  $\beta_0$  was significantly negative ( $M=-3.49$ ,  $SD=4.18$ ,  $t(49)=-6.00$ , one-sided  $p<.001$ )  
298 indicating that participants preferred the HC option over the MC option, if both options offered equal  
299 monetary payoffs. Similarly,  $\beta_1$  was significantly negative ( $M=-17.21$ ,  $SD=19.67$ ;  $t(49)=-6.19$ , one-sided  
300  $p<.001$ ), showing that across participants, as expected, the probability for choosing HC increased with  
301 higher monetary gain for HC relative to MC (figure 7). Since  $\beta_0$  is directly convertible into the probability  
302 to select HC given equal monetary payoffs of the two options, we will base the following analyses on this  
303 more intuitive measure. More specifically, if the nominal monetary offer for both options was equal, there  
304 was a strong preference for HC, with over 90% of the participants preferring the controllable over the less  
305 controllable option ( $MD=95.1\%$ ,  $IQR=20.48$ , figure 7), which was significantly above 50% (Wilcoxon signed-  
306 rank  $W=1182$ , one-sided  $p<.001$ ). Importantly, the subjects' probability to choose HC given equal expected  
307 values for HC and MC remained significantly above 50% ( $MD=65.98\%$ ,  $IQR=50.48$ , Wilcoxon signed-rank  
308  $W=863$ , one-sided  $p=.015$ ) even when considering differences in expected outcome probabilities, by  
309 controlling for differences in subjectively perceived winning histories, that deviated from the objectively  
310 presented outcome rates of 50% for the two tasks (see Methods).

311 A further goal of study 3 was to demonstrate that participants' preference for HC over MC varies  
312 in dependence of the affective dynamics during the main task. As expected, individuals who had a more  
313 positive pride response showed a stronger preference for HC in the choice task, given equal values of the  
314 two choice options (Spearman's  $\rho=.47$ , one-sided  $p<.001$ ; figure 7). This association remained significant  
315 even after controlling for various control variables such as expended effort or perceived winning  
316 probabilities (see Supplement 1 – table S6). This extends previous results showing that mere choice is  
317 preferable to not having choices by highlighting the notion of instrumental control over the outcomes for  
318 building preferences<sup>26</sup>, and emphasizing that self-related positive affect is a relevant factor for motivated  
319 behavior<sup>28</sup>.

320

321

322 **Studies 1 – 3: Interindividual Variability in Control Beliefs Predicts Pride Response**

323 Aggregating data from all 129 participants, we finally tested whether interindividual differences in  
324 the degree to which the task could stimulate control beliefs were associated with self-related affective  
325 experiences. Across the three studies, participants who perceived more control in HC compared to MC  
326 also showed stronger pride responses (Spearman's  $\rho=0.25$ , one-sided  $p=0.003$ ; figure 8), supporting the  
327 notion of how individual differences in the experience of internal control drive self-conscious positive  
328 affect<sup>27,31</sup>.

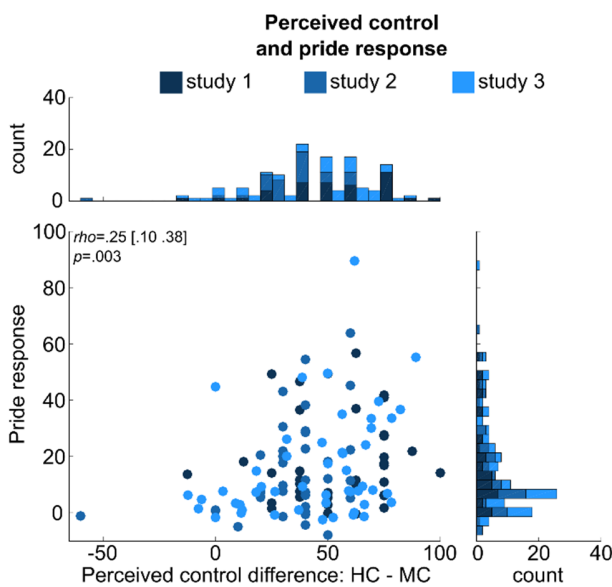

**Figure 8.** Association of pride response and individual differences in the experience of control. The scatterplot depicts the relationship between internal control beliefs and pride response across all three studies. Dark blue indicates data point belongs to study 1, intermediate blue to study 2, and light blue to study 3. Raw controllability ratings were transformed to a range between 0 and 100, across internal control conditions, before computing the difference between HC and MC in each study. For study 1, raw control and pride ratings were averaged across LC and MC. The pride response is the interaction term for pride ( $[\text{HC:WIN}-\text{HC:noWIN}] - [\text{MC:WIN}-\text{MC:noWIN}]$ ). Histograms depict counts for difference in perceived control (top), and pride response (right). Values in brackets represent lower and upper bounds of the 90% confidence interval for

329

330

331

## Discussion

332 By employing a novel experimental paradigm, we demonstrate that task environments with  
333 internal control beliefs entail unique affective consequences with associated shifts in neural processing.  
334 Precisely, tasks offering internal control allow self-attribution of outcomes. Thereby, such contexts  
335 differentiate self-conscious positive affect – i.e. pride – from more unspecific positive affect – i.e.  
336 happiness – when receiving task outcomes. Using functional magnetic resonance imaging, we furthermore  
337 characterize brain regions involved in altered valuation of outcomes achieved in controllable tasks. In the  
338 task environment in which outcomes more strongly depend on own-contributions we see increased  
339 activity in brain regions of the cortical midline, such as the medial prefrontal cortex and precuneus, that  
340 are associated with self-related processing<sup>53,54</sup>. Here, the vmPFC seems to play a key role in tracking both  
341 success as well as internal control. In addition, activity in these regions is more strongly related to  
342 functional responses of brain regions processing reward information, i.e. ventral striatum, when outcomes  
343 depend on one's own behavioral performance. In a final step, we highlight the subjective value of the  
344 emerging self-related affect, as people discount monetary gains for tasks offering internal control in  
345 dependence of their pride response during task execution.

346 Overall, our findings provide evidence for the link between internal control beliefs and the  
347 affective reaction of pride. This concords with psychological theories of self-conscious affect, stating that  
348 internal control allows attributing task outcomes to internal causes, such as one's abilities<sup>1,27</sup>. Self-  
349 evaluative processes are crucial to the understanding of self-conscious affect like pride<sup>27</sup>, differentiating  
350 them from other affect constructs such as happiness. While positive affect was generally increased in  
351 response to successes under high control this was particularly the case for pride responses and less so for  
352 participants' reports of happiness which conceptually does not necessarily includes processes of  
353 evaluating one's self-worth<sup>27,57</sup>. Since in potentially controllable contexts outcomes are informative about  
354 one's abilities, participants can use these outcomes to infer to what extent they succeed at actually

355 exerting control. Regarding affective responses, this was reflected by the fact that pride was most  
356 prominent in the task allowing the highest levels of internal control.

357           Importantly, individuals with stronger control-dependent pride responses preferred to partake in  
358 the task offering internal control over another, less controllable one. Concordant with earlier  
359 findings<sup>20,28,58</sup>, and substantiating the claim that self-conscious affect is central in the guidance of future  
360 behavior<sup>27</sup>, this finding underlines the motivational effects of pride<sup>30</sup>. Strikingly, preferring to choose an  
361 opportunity to exert control outweighed a monetary detriment entailed by this choice behavior.  
362 Collectively, this indicates that the development of behavioral preferences is partially driven by the extent  
363 to which an individual perceives contexts to be controllable and how succeeding in such contexts manifests  
364 in the experience of self-related affect, such as pride. That is, the experience of mastering a task might  
365 elicit feelings of pride and competence that increase the probability of choosing to perform the same or  
366 similar behaviors later on, dovetailing nicely with theories linking experiences of competence to intrinsic  
367 motivation<sup>1</sup>.

368           Guided by automated meta-analysis<sup>52</sup>, we show that these effects of self-attribution on outcome  
369 processing are mediated via two distinctive, but connected brain networks associated with the processing  
370 of value and self-related information. Outcomes from tasks with high control were associated with activity  
371 in brain regions linked to self-related information processing, such as CMS<sup>45,46</sup>, since outcomes in  
372 controllable tasks are informative about one's abilities and thus inherently self-relevant. This is an  
373 important amendment to previous evidence and underscores that control beliefs need to be understood  
374 beyond having a choice or not in order to understand how subjects develop self-esteem<sup>32</sup> and concepts of  
375 their own capabilities in acting on the environment<sup>1</sup>. Our findings thus are in line with other studies  
376 showing that ACC is implicated in monitoring self-initiated actions<sup>59</sup> or vmPFC being involved in outcome  
377 monitoring, especially when events are relevant to the individual<sup>45</sup>. However, while paralleling these  
378 earlier findings, our data also provide novel insights by relating these processes to the concept of self-  
379 conscious affect. First, in the condition eliciting the strongest pride, i.e. when receiving outcomes

380 indicating success in a controllable task, the vmPFC was significantly more active than in any other  
381 condition. Second, in contexts of internal control beliefs, regions associated with processing self-related  
382 information such as left AG, vmPFC, and dmPFC, were more strongly coupled to VS, which is implicated in  
383 the processing of reward information<sup>24</sup>, and these effects correlated with behaviorally measured pride  
384 responses across subjects. Third, intraindividual variability in pride covaried more strongly than happiness  
385 with neural activity in vmPFC. Collectively, these findings support the notion that self-related positive  
386 affect might depend on the integration of outcome information with self-representations, mediated via  
387 regions of the cortical midline and AG, mirroring findings of studies investigating other types of self-  
388 conscious affect<sup>60</sup>.

389         Regarding the relationship of affect and neural processing, Rutledge and colleagues<sup>33</sup> more  
390 recently linked moment-to-moment variability of happiness to errors in reward prediction, which in turn  
391 is associated with activity in the VS. In a follow-up study, they highlighted the importance of investigating  
392 “instrumental control” for a deeper understanding of well-being<sup>34</sup>. Our study takes a first step in this  
393 direction by manipulating internal control beliefs, underlining its importance for differentiated affective  
394 experience and downstream motivational effects that manifest in behavioral preferences. However, our  
395 study design does not allow explicit modeling of reward expectations and associated reward prediction  
396 errors. While recent work suggests how control beliefs and prediction error processing might  
397 interact<sup>19,26,37</sup>, explicit neuroscientific investigations of their interplay are lacking. Thus, future studies  
398 should directly test how prediction error signaling changes in controllable environments, how this relates  
399 to affective dynamics, and how these processes are mediated neurally<sup>34,61</sup>.

400         Our findings replicate and extend previous work on the value of control<sup>18,20</sup> by demonstrating that  
401 participants preferred a controllable task over an uncontrollable one, reflecting differences in subjective  
402 value that are likely processed by vmPFC<sup>15</sup>. This is supported by previous studies showing activation  
403 differences in vmPFC for the anticipation of choice vs. non-choice<sup>20</sup>. However, the core feature of our study  
404 was a condition supplying participants with an internal model of how their behavior maps to outcomes,

405 extending the concept of control beliefs beyond merely having a choice<sup>26</sup>. Rather, the high control  
406 condition in our task suggested that the subjects' performance determined whether or not a goal was  
407 reached. This condition yielded the strongest affective reactivity to outcomes, which was reflected in  
408 activity changes in the vmPFC within subjects and increased functional coupling of the vmPFC with VS.  
409 Hence, vmPFC might serve the integration of outcome information with representations of one's  
410 abilities<sup>50,54,62</sup>, potentially driving differences in behavioral preferences for subjectively more or less  
411 controllable tasks<sup>15,26,42</sup>. Future research could follow this path by assessing directly how control-  
412 dependent outcome valuation translates into behavioral preferences in subsequent choice situations and  
413 how this might be mediated neurally by processing of subjective value in the vmPFC.

414         Pride experiences in response to outcomes that can be attributed to the self foster self-esteem.  
415 Thereby they effectively shape meta-cognitive beliefs about oneself and estimates of one's social  
416 status<sup>32,63</sup>. A recent study investigated updating of state self-esteem in response to evaluation through  
417 others<sup>51</sup> and found these updates to be positively correlated with activity in vmPFC. Comparably, in a study  
418 in which participants were asked to imagine or remember pride-associated events, significant activations  
419 in the medial prefrontal cortex were found that extended into vmPFC<sup>64</sup>. Furthermore, two recent studies  
420 have supported this role of vmPFC in the updating of self-related beliefs<sup>50,65</sup>. In this perspective, the vmPFC  
421 activation and affective dynamics we observed in response to outcomes from controllable tasks might  
422 reflect correlates of short-term updating of beliefs about one's abilities. If subjects experience pride this  
423 might contribute to updating their concepts of their own capabilities in a specific environment. In the long  
424 run, such positive self-evaluations support self-esteem and help individuals with developing an  
425 understanding of their worthiness<sup>66</sup>.

426         From a broader perspective the findings described here have implications for learned helplessness  
427 and psychiatric conditions, such as major depressive disorder<sup>13,42</sup>. Our results emphasize that lower  
428 internal control beliefs are associated with reduced attribution of positive outcomes to the self, relating  
429 to decreased pride experiences. Further, these reductions in self-related affective responses align with

430 diminished preferences for tasks offering opportunities for exerting control. These dependencies might  
431 contribute to reduced self-esteem in the long run<sup>32</sup> and reduced motivation to show goal-directed  
432 actions<sup>1,13</sup>. Such processes could therefore causally relate to depressive episodes, which are centrally  
433 defined by negative views of the self and lack of motivation<sup>14</sup>. In contrast to states of reduced internal  
434 control, other psychiatric phenomena such as pathological gambling are characterized by an increase in  
435 internal control beliefs, even in contexts offering no evidence for actions being linked to outcomes by ways  
436 other than chance<sup>67-69</sup>. In this regard, our data hint at a possible role of affective reactions to  
437 (un)controllable events in mediating the development of gambling addictions<sup>70</sup>. Individuals who perceive  
438 control over objectively uncontrollable events might experience positive self-related affect once a desired  
439 outcome – such as “cracking” a one-armed bandit – is obtained, and might thus be at greater risk of  
440 developing gambling addictions. Therefore, the findings presented here provide a first hint for future  
441 clinical research to refocus on perturbed beliefs of control over the environment to understand affective  
442 and motivational symptoms as well as altered neural dynamics associated with psychiatric conditions.

443 In conclusion, the three studies provide unequivocal evidence that internal control beliefs impact  
444 the valuation of outcomes, resulting in entangled positive self-conscious affect and behavioral preference  
445 for environments with greater perceived control. While based on a classical understanding of control  
446 beliefs<sup>4,6,7</sup>, the present studies add to our understanding of how outcomes that have been achieved  
447 through one’s own actions recruit neural systems involved in computations of reward value and self-  
448 relatedness<sup>54</sup>. Increased interactions of the ventral striatum and cortical midline structures, as well as  
449 responses of the vmPFC that track both shifts in outcome processing under internal control beliefs and  
450 self-conscious positive affect thereby provide first links to how self-attribution of desirable events drives  
451 motivation and future behavior<sup>26</sup>. On a more general note, our studies underline the need for the  
452 neurosciences to consider how behavior and subjective experiences are shaped by beliefs individuals hold,  
453 that regard how their actions relate to events in the world they live in and interact with. Taking further  
454 steps in this direction promises to deepen our understanding of affect, motivation, and underlying neural



455 dynamics with important implications for scientific models of behavioral control, general well-being, and  
456 psychiatry<sup>1,2,26,37</sup>.

457

## Material and Methods

### 458 Participants

459 A total of 154 participants took part in the three studies (mean age: 23.41 years; SD: 3.41; range,  
460 18-37; 77 females). All experimental designs were approved by the ethics committee of the University of  
461 Lübeck, Germany (AZ 16-133). Participants had to be right-handed, speak fluent German, have no deficits  
462 in color vision, normal or corrected-to-normal vision, and no pre-existing psychiatric or neurological  
463 conditions. Psychology students (study 1: in the second or later year of university) were not invited. In  
464 study 2, contraindications for fMRI scanning (e.g. pregnancy, metal parts inside the body) were additional  
465 exclusion criteria. All participants gave written informed consent prior to participation in the study, were  
466 debriefed after completion of the experimental session, and received monetary compensation or partial  
467 course credit for participation. See table 1 for details on the individual samples.

**Table 1.** Descriptive statistics for study samples

|         | n   | age in years |           |       | female/male |
|---------|-----|--------------|-----------|-------|-------------|
|         |     | <i>M</i>     | <i>SD</i> | range |             |
| Study 1 | 40  | 23.33        | 3.11      | 18-31 | 14/26       |
| Study 2 | 39  | 23.31        | 3.87      | 18-37 | 32/7        |
| Study 3 | 50  | 23.55        | 3.34      | 18-32 | 30/19       |
| overall | 129 | 23.41        | 3.41      | 18-37 | 77/52       |

**Note.** In study 1, the post-experimental interview indicated that 9 out of 49 tested participants did not believe the cover story (i.e. they informed us that they did not believe that feedback depended on their behavior but was manipulated), who were therefore excluded from further analysis. In study 2, 10 out of 49 tested participants had to be excluded due to various reasons (did not believe the cover story: 6 / excessive motion: 1 / technical problems: 3). For study 3, 6 out of 56 tested participants had to be excluded from the analysis (did not believe the cover story: 4 / could not fit choice function because subject chose only one option: 1 / already participated in fMRI study: 1). *M*=mean. *SD*=standard deviation.

468

### 469 Design and Procedure

470 **Description of the main experimental task.** In the main experimental task we manipulated  
471 internal control beliefs over task outcomes across three levels (low, medium and high control; in the  
472 following LC, MC and HC). The tile task displayed a grid-pattern of two halves of turquoise and yellow  
473 squares surrounding a single grey square in the center (figure 1). On each trial, orientation of halves (left-

474 right or upper-lower arrangement) and brightness of squares within each half was pseudo-randomly  
475 defined. On each trial, three, four or five squares on each half (targets) were assigned a brightness that  
476 was considerably higher than the remaining ones (distractors). Targets never appeared side by side.  
477 Crucially, while there were random differences in brightness of all distractor squares, the brightness of  
478 target squares was kept near identical rendering a definite identification of the brightest square within  
479 one half impossible. The brightness of the grey square in the center remained constant across the  
480 experiment.

481 Perceived controllability of task outcomes was manipulated in a within-participants design. In the  
482 low control (LC) condition, participants were instructed to *click* on the central grey square. In 50% of trials  
483 clicking the square was pseudo-randomly followed by a win and in the other 50% by a no win outcome (in  
484 the following: WIN and noWIN). In the medium control (MC) condition, participants were instructed to  
485 *choose* one color (i.e. yellow or turquoise) by clicking on any square of that color. Again, in 50% of trials  
486 choosing a half was pseudo-randomly followed by either a WIN or a noWIN outcome. In the high control  
487 (HC) condition, participants were instructed to *identify* the brightest square of either the yellow or  
488 turquoise half of the grid. Again, in 50% of trials the identification of the putatively brightest square was  
489 pseudo-randomly followed by either a WIN or a noWIN outcome.

490 In each study, given that no mistakes were made (i.e., response was fast enough, and participant  
491 did not click on background instead of a square, and a square of the correct color was clicked in the HC  
492 condition), an equal amount of trials was presented for every combination of outcome valence (WIN,  
493 noWIN) and control (LC, MC, HC in study 1; MC, HC in studies 2 & 3). The number of ratings was equally  
494 distributed across combinations of outcome valence and internal control condition and the same for pride  
495 and happiness. The level of internal control regarding each condition (HC, MC, and LC; “How strongly could  
496 you influence / control the outcome in the different tasks?”, ranging from “very strongly” to “not at all”;  
497 see below) was rated after the main task using 5-point Likert-type scales in studies 1 & 2, while a  
498 continuous horizontal rating scale was used in study 3.

499 All subjects in a given study were tested in the same laboratory room and lighting conditions were  
500 held constant by lowering the window blinds and setting the dimmable electric lights to the same level.  
501 Brightness of the 3-5 brightest squares was randomly set on each trial within these pre-defined limits in  
502 studies 1 & 2. In study 3, instead of creating a unique display by setting the previously described  
503 parameters randomly on each trial, a predefined pool of 100 grid stimuli was used, which was shuffled and  
504 therefore randomly assigned to each condition for each subject.

505 In each study, presentation of WIN and noWIN outcomes was manipulated, so that the overall  
506 probability of receiving each outcome would be fixed to 50% for every condition. In case a square was  
507 clicked that was not defined as belonging to the set of brightest squares on a given HC trial, a noWIN was  
508 presented in order to maintain credibility of the task. The predefined sequence of WIN and noWIN  
509 outcomes was designed in a way that no more than four WIN or noWIN trials appeared consecutively  
510 across conditions, and that no more than two WIN or noWIN trials appeared consecutively within  
511 conditions. Additionally, no condition appeared more than two times in a row. This was done in order to  
512 maintain an expectation of receiving a WIN (noWIN) outcome close to 50% across the course of the task.

513 All experimental stimuli were presented using the Psychophysics Toolbox<sup>71</sup> for Matlab (Mathworks  
514 Inc, Natick, MA). Post-experimental interviews were administered using computerized questionnaires  
515 presented in Sosci Survey (Sosci Survey GmbH, München, Germany).

516 **Study 1: Dynamics of self-evaluative positive Affect.** Prior to the main experiment, and after a  
517 short demonstration of the three task conditions, participants completed a practice session (see below)  
518 so that they could learn a) the timing of the task, and b) that they would receive approximately 50% WIN  
519 and 50% noWIN feedbacks in all three conditions.

520 After the practice session and prior to the main task, participants completed two trials of every  
521 condition including one WIN and one noWIN outcome each, and ratings of pride and happiness in order  
522 to learn the timing of the complete trial structure. Subsequently, participants performed a total of 90 trials  
523 (figure 1B) of the experimental task. The sequence of conditions and outcome valence in each condition

524 was predefined, such that no condition appeared more than twice in a row. Additionally, no more than  
525 four consecutive WIN or noWIN trials were presented across conditions, and no more than two repetitions  
526 of the same outcome valence appeared within conditions. Ratings of pride and happiness were displayed  
527 side-by-side after each trial and visualized as thermometers initiated at 0 and ranging to 100. Participants  
528 could rate their subjective feelings of pride and happiness in any order by clicking on the corresponding  
529 levels of the two thermometers and confirming their ratings using a *done*-button on the bottom of the  
530 screen.

531 **Study 2: Neural Foundations of Outcome Valuation in the Context of internal Control.** The  
532 procedure in the study 2 largely followed that of the study 1, with a few changes. First, the LC condition  
533 was not presented in the fMRI in order to reduce scanning time and to perform a more conservative  
534 comparison between the MC and HC conditions that both had a component of choice. A total of 80 trials  
535 were presented, followed by a rating of either pride or happiness (figure 1B) on each or every second trial.  
536 If no mistakes were committed, this yielded a total of 24 ratings each for pride and happiness, 12 for each  
537 condition, and 6 for every combination of WIN/noWIN and condition. For approximately half of the  
538 participants, the trials on which pride and happiness were rated were switched. In case a mistake was  
539 committed, both the feedback and the rating on that trial were replaced by a warning and a prolonged  
540 inter-trial-interval (ITI) until the planned onset time for the next trial was reached.

541 After a short explanation of the task outside the scanner, the practice session in the fMRI study  
542 was done inside the fMRI scanner and followed the same structure as in the study 1, as did the post-  
543 experimental interview and debriefing. Participants completed all tasks with an fMRI-compatible  
544 computer mouse (NAtA TECHNOLOGIES, Coquitlam, Canada) and their right arm rested on a tilted  
545 mousepad supported by an adjustable armrest. ITIs were pseudo-randomly jittered between 3-5 seconds  
546 during which a fixation cross was presented in the center of the screen. Following a 1 second cue, the task  
547 was presented for 4.75 seconds and after a 4 second delay, the outcome was presented for 3 seconds. On  
548 each or every second trial, participants were asked to rate within 4 seconds either how proud or how

549 happy they felt regarding the preceding outcome. Ratings were given on a horizontal rating scale initiated  
550 at an intermediate position (“somewhat”) and ranged from “not at all” to “very” (figure 1), and converted  
551 to values ranging from 0 through 100.

552 **Study 3: Pride as an Affective Marker for the Subjective Value of Control.** Study 3 consisted of  
553 two behavioral paradigms (figure 1B). After an initial demonstration of the task and a practice session, 64  
554 trials of the main task were presented, and pride ratings were collected on 40 pseudo-randomly selected  
555 trials. Thereafter, participants completed a choice task in which on each of 96 trials they were given a  
556 choice between performing either the MC or the HC condition. Importantly, each choice option was  
557 associated with varying amounts of money (see below for details). For instance, a subject could have the  
558 choice between participating in the MC condition for a potential gain of 1 € or, alternatively, participate in  
559 the HC condition for a potential gain of 0.9 €. On eight pseudo-randomly selected trials, participants  
560 performed the chosen task, and were informed that after the experiment they would receive the sum of  
561 all successfully completed trials. No outcomes were presented during this part of the experiment to avoid  
562 influencing the participants’ expectation of succeeding.

563 The algorithm we used to determine the potential monetary gains of the choice options on each  
564 trial followed the logic of an adaptive staircase algorithm for the detection of perceptual detection  
565 thresholds as used in psychophysics<sup>56</sup>. Specifically, on each trial, one of the two choice options was  
566 selected as the *reference* and assigned a value of 1€, while the other option was assigned another value  
567 that was either higher or lower than the reference value. E.g., if this *comparison value* was higher than the  
568 reference value on a given trial and the participant picked the higher value, the comparison value was  
569 decreased by a predefined fraction in the following trials until the participant changed her decision and  
570 chose the option with the reference value. In this fashion we aimed to find the point at which each  
571 individual participant valued both choice options equally. A description of the staircase-algorithm we  
572 employed is detailed below.

573           Between the main task and the choice task, participants gave a number of ratings regarding their  
574 experience of the task. These ratings included the participants' estimate of the percentage of WIN and  
575 noWIN outcomes they had received during the different conditions in the main task, or they thought they  
576 would receive if they continued to perform the same conditions in the future.

577           **Practice Task (studies 1, 2, & 3).** The practice task preceding the main experiment was conducted  
578 in order to minimize differences in outcome expectations between the three conditions. During the  
579 practice session, participants completed 15 trials of each condition without any feedback during the first  
580 twelve trials. Instead, subjects received manipulated feedback during the last three trials of the different  
581 conditions, indicating that they had "won" (LC), "chosen correctly" (MC), or "found the brightest square"  
582 (HC) in approximately 50% of the preceding trials. Precisely, there were three sets of feedback percentages  
583 (46, 50, 54 / 47, 50, 53 / 48, 50, 52), that were randomly assigned to the task condition based on the  
584 subject ID and the order of each set was randomized for each condition and every subject. In case a subject  
585 made too many mistakes (i.e. responded too slowly, clicked on the background, clicked a square of the  
586 incorrect color in the HC condition, or did not click on the grey square in the LC condition on more than ¼  
587 of the completed practice trials) after the first eleven practice trials of a condition, the subject was  
588 informed about this by an on-screen message and the respective practice block was repeated. Before the  
589 start of the practice session, subjects were informed that depending on their performance in the practice  
590 blocks, they would be assigned to one of three groups gaining either 10, 15 or 20 €-cents on each correct  
591 trial of the main task and that the better they performed the more money they could gain during the main  
592 task. After the practice session, all subjects were informed that they had been assigned to the 20-cent  
593 group (irrespective of their performance).

594           **Description of Ratings.** In study 1, ratings of both pride and happiness were administered after  
595 every outcome, using thermometer-like rating scales, ranging from 0 through 100, and initialized at 0 (see  
596 figure 1). Subjects could decide which affect to rate first and completed their rating by clicking a *done*-  
597 button. In study 2, either pride or happiness ratings were administered after a given trial, with a total of

598 24 ratings for each affect (6 for each combination of outcome valence (WIN, noWIN) and control (MC, HC).  
599 For 20 out of the 39 subjects included in the analyses in study 2, the predefined assignment of pride and  
600 happiness ratings to a given outcome was switched. In study 3, only pride was rated after a total of 40  
601 trials, equally distributed over all combinations of outcome valence and control. In studies 2 and 3 ratings  
602 were administered using horizontal rating bars, asking subjects how strongly they felt a given affect with  
603 regard to the preceding outcome. Scales ranged from *not at all* through *somewhat* to *very* and were  
604 initialized at *somewhat*, i.e. a neutral position.

605 Ratings of internal control beliefs in studies 1 and 2 were assessed using a paper-pencil 5-point  
606 Likert scale asking participants “How strongly could you influence the outcome in the different tasks?”,  
607 with the different options being: “very strongly”, “strongly”, “neutral”, “weakly”, “very weakly”. In study  
608 3, two items were used to assess control beliefs, with the first item asking the same question as in studies  
609 1 and 2. The second item asked “How strongly could you control the outcome in the different tasks?”. In  
610 study 3, a horizontal rating bar ranging from “very weakly” through “somewhat” to “very strongly” was  
611 displayed after the main task, similar to the affect ratings and initialized at a neutral position (i.e.  
612 “somewhat”). In study 3, ratings from both items were averaged for each condition in order to measure  
613 internal control beliefs.

614 In addition to ratings measuring control beliefs, after the main task in study 3, a set of additional  
615 questions was asked – separately for MC and HC – that was later used to statistically control the  
616 relationship between the pride response and choice behavior (Supplement 1 – tables S5 & S6). All  
617 questions were asked using a horizontal rating bar like the ones used for the affect ratings and the control  
618 ratings in study 3 and all answers were initialized at a neutral position and recoded to range from 0 to 100.

619 **Choice Task (Study 3).** The algorithm we used to determine the potential monetary gains of the  
620 choice options on each trial followed the logic of an adaptive staircase algorithm for the detection of  
621 perceptual detection thresholds as used in psychophysics<sup>56</sup>. More specifically, on each trial, one of the two  
622 choice options was selected as the *reference* and assigned a value of 1€, while the other option was



623 assigned another value that was either higher or lower than the reference value, called the comparison  
624 value. This comparison value was changed on each trial by a certain step size in a specific manner detailed  
625 below.

626 In the beginning of the task, two step sizes were used: 33 cents and 17 cents. Additionally, the  
627 comparison value could either be smaller or larger than the reference value and was initially calculated by  
628  $3 \times$  step size, giving four sets of initial comparison values: 1.99€, 1.51€, 0.49€, 0.01€. Since either HC or MC  
629 could be the reference value on a given trial, we obtained a total of 8 initial starting values, defining 8 so-  
630 called comparison sets.

631 The task was programmed to contain four phases of 24 trials each that were not explicitly  
632 conveyed to the participants. In the first phase, only those comparison sets were used that started with a  
633 step size of 17 cents (i.e. comparison values starting at 1.51€ or 0.49€). In the second phase, two thirds of  
634 the trials belonged to these sets, while one third were trials starting with comparison values of 1.99€ or  
635 0.01€ (i.e. step sizes of 33 cents). In the third phase of the task, two thirds of the trials belonged to the  
636 comparison sets with a step size of 33 cents and all of the trials in the fourth phase belonged to this set.

637 In each phase, 2 trials were randomly selected to be actually played by the subject (being HC or  
638 MC, depending on the subject's choice), without showing an outcome. Subjects were informed that in the  
639 end, they would receive the amount gained from those trials on which they succeeded (i.e. found the  
640 brightest square in HC; selected the correct color in MC). However, they truly received 50% of the amounts  
641 they chose and played for during the decision task.

642 If on a given trial the comparison value (e.g. HC = 1.99€) was higher than the reference value (e.g.  
643 MC = 1€) and the subject picked the choice option with the (higher) comparison value, the comparison  
644 value was decreased by the current step size (e.g. 33 cents) in the following trials of the same comparison  
645 set until the subject changed her decision and picked the option with the reference value. As an example,  
646 the MC condition could be defined as the reference (1 €), while the initial comparison value of HC could  
647 be 1.99 €. Choosing HC for 1.99 € would lead to a decrease of the comparison value to 1.66 € on the next

648 trial of this comparison set. The comparison value would be decreasing as long as HC is preferred over MC.  
649 At some point, e.g. when HC has a value of .67 €, the subject might prefer MC (having a value of 1€). Now,  
650 the comparison value is *increased* until the subject's decision changes a second time, and the comparison  
651 value starts to decrease again, this time by a smaller fraction than before (*previous step size/1.25*),  
652 therefore iteratively approximating the point at which the subjective value of both options are subjectively  
653 equal for this participant. On each trial, a random amount between -5 and 5 cents was added to the values  
654 in order to decrease monotony of the task. The highest offered value was 1.99€ and the lowest was 0.01€.

655 **FMRI Data Acquisition.** Participants were scanned using a 3T Siemens MAGENTOM Skyra scanner  
656 (Siemens, München, Germany) at the Center of Brain, Behavior, and Metabolism (CBBM) at the University  
657 of Lübeck, Germany. After four dummy-scans allowing for equilibration of T1 saturation effects, 768  
658 volumes with 39 near-axial slices in ascending order were acquired for each participant using echo-planar-  
659 imaging (voxel size=3\*3\*3 mm, 68\*68 matrix, 20% interslice-gap, TR=2000 ms, TE=25 ms, 90° FA, iPAT=2).  
660 In addition, a high-resolution anatomical T1 image was acquired that was used for coregistration (voxel  
661 size=1\*1\*1 mm, 256\*256 matrix, TR=1900 ms, TE=2.44 ms, 9°FA).

662

### 663 **Statistical Analyses**

664 The statistical analyses of subject ratings were performed using JASP version 0.9<sup>73</sup>. MRI data were  
665 analyzed using SPM12<sup>74</sup>, and the logistic choice models in study 3 were fitted using Matlab R2016a. The  
666 comparison of correlations between PPI-effects and affective responses in study 2, as well as FDR-  
667 correction of *p*-values regarding these correlations were performed in R<sup>75</sup>.

668 **Manipulation Checks.** In order to verify that subjects could not reliably detect the brightest  
669 square, we computed how many times in the entire experiment the brightest square of a given color would  
670 be found given a subject performed at chance level. For instance, if in a given trial three squares were  
671 defined to be the brightest squares, there was a chance of 1/3 to find the brightest square. We computed  
672 the level of chance performance for each subject individually, accounting for the fact that by chance, the

673 number of trials in which 3, 4, or 5 squares were the brightest could vary between subjects (due to the  
674 design of the experimental task). We performed paired t-tests in each study, comparing the number of  
675 times each subject found the brightest square with the level of chance performance. These analyses  
676 indicated, that in no study performance exceeded chance level. In fact, in every study, subjects performed  
677 significantly worse than chance (study 1:  $t(39) = -33.931, p < .001$ ; study 2:  $t(38) = -2.311, p = .026$ ; study  
678 3:  $t(49) = -2.762, p = .008$ ).

679 The objective rates of receiving WIN and noWIN outcomes did not deviate significantly from 50%  
680 in any study (study 1: LC:  $M=50.45\%$ ,  $SD=1.78$ ,  $t(39)=1.601$ , two-sided  $p=.117$ , MC:  $M=50.26\%$ ,  $SD=1.29$ ,  
681  $t(39)=1.272$ , two-sided  $p=.211$ , HC:  $M=50.01\%$ ,  $SD=2.20$ ,  $t(39)=0.030$ , two-sided  $p=.977$ ; study 2: MC:  
682  $M=50.10\%$ ,  $SD=1.14$ ,  $t(38)=0.556$ , two-sided  $p=.581$ , HC:  $M=49.88\%$ ,  $SD=1.70$ ,  $t(38)=-0.437$ , two-sided  
683  $p=.664$ ; study 3: MC:  $M=50.55\%$ ,  $SD=1.42$ ,  $t(49)=0.275$ , two-sided  $p=.784$ , HC:  $M=50.00\%$ ,  $SD=1.15$ ,  
684  $t(49)=0.0005$ , two-sided  $p=.999$ ), nor were there any significant differences in outcome rates between  
685 conditions (study 1:  $F(2,78)=0.572, p=.567$ ; study 2:  $t(38)=-0.703$ , two-sided  $p=.487$ ; study 3:  $t(49)=-0.234$ ,  
686 two-sided  $p=.839$ ).

687 Participants' subjective reports of the perceived percentages of WIN and noWIN outcomes did not  
688 differ from 50% in studies 1 and 2 (study 1: LC:  $M=51.60\%$ ,  $SD=12.36$ ,  $t(39)=0.818$ , two-sided  $p=.418$ , MC:  
689  $M=48.23\%$ ,  $SD=6.60$ ,  $t(39)=-1.70$ , two-sided  $p=.097$ , HC:  $M=50.70\%$ ,  $SD=14.78$ ,  $t(39)=-.300$ , two-sided  
690  $p=.766$ ; study 2: MC:  $M=48.13\%$ ,  $SD=6.37$ ,  $t(37)=-1.808$ , two-sided  $p=.079$ , HC:  $M=52.07\%$ ,  $SD=10.29$ ,  
691  $t(37)=1.216$ , two-sided  $p=.232$ ), nor were there any significant differences between conditions (study 1:  
692  $F(2,78)=.982$ , two-sided  $p=.379$ ; study 2:  $t(37)=-1.936$ , two-sided  $p=.061$ ). Surprisingly, in study 3 subjects  
693 reported having received significantly less than 50% WIN outcomes in MC ( $M=46.66\%$ ,  $SD=11.75\%$ ,  $t(49)=-$   
694  $2.011$ , two-sided  $p=.049$ ,  $d=-0.28$ , 90%  $CI=[-.57, -.0002]$ ), and significantly more than 50% WIN outcomes  
695 in HC ( $M=54.51\%$ ,  $SD=12.07\%$ ,  $t(49)=2.640$ ,  $p=.011$ , two-sided,  $d=0.37$ , 90%  $CI=[.09, .66]$ ), contradicting  
696 the objective outcome rates. We therefore controlled the results of study 3 for differences between  
697 conditions regarding subjective outcome rates.

698           **Analysis of affective Dynamics in Studies 1, 2, and 3.** For each participant, we calculated the mean  
699 ratings of pride or happiness (study 3: only pride), separately for each combination of condition (LC (only  
700 study 1), MC, HC) and outcome valence (WIN, noWIN), for all valid trials (i.e. excluding those in which the  
701 participant either clicked on the background or did not respond fast enough). The resulting variables were  
702 then taken as dependent variables in repeated measures analyses of variance (rmANOVA), using the  
703 factors condition, outcome valence, and affect (factor affect only in studies 1 & 2). Paired comparisons  
704 were then used to disentangle significant effects of interest.

705           **Correlation of Control Beliefs and Pride Response across Studies.** In order to perform a more  
706 direct test regarding the relationship between internal control beliefs and pride, we computed the pride  
707 response from the data of each study ( $[HC:WIN - HC:noWIN] - [MC:WIN - MC:noWIN]$ ). Hence, a positive  
708 pride response indicated that participants reported greater outcome-dependent differences in pride  
709 under HC than under MC. Additionally, after transforming the control ratings from each study to values  
710 between 0 and 100 across HC and MC, we computed the difference between control ratings for the  
711 different levels of control. For this analysis, control ratings and pride ratings from study 1 were averaged  
712 across LC and MC. Non-parametric correlation analysis (Spearman's rho) was used to test the relationship  
713 between the pride response and differences in control beliefs between HC and MC.

714           **Analysis of Choice Data in Study 3.** We predicted the probability for each subject to choose the  
715 HC option on a given trial by fitting a logistic model to the choice data. We calculated the ratio of the  
716 potential monetary gain for the HC option (e.g. 1.37 €) to the one for the MC option (e.g. 1.01 €) on each  
717 of the 96 trials and transformed this ratio to log-space (e.g.  $\log(1.37/1.01) = .3049$ ). Thus, positive values of  
718 the resulting predictor variable indicate a higher potential gain for HC than for MC on a given choice trial,  
719 negative values indicate a relatively higher potential gain for MC, and a value of zero indicate equality of  
720 gains for the two options.

721 Considering the general form of logistic models,

722 
$$p(\text{choose BRIGHTNESS}|X = x_1) = \frac{1}{1 + \exp(\beta_0 + \beta_1 * X_1)}$$

723 participants with parameters  $\beta_0$  and  $\beta_1$  both equaling zero would have a 50% probability of choosing HC  
724 on a given trial, regardless of the value of  $X_1$  ( $X_1$  being the log-transformed ratio of the monetary values  
725 offered for HC and MC). Assuming equal offers for HC and MC, negative values of  $\beta_0$  indicate that a  
726 participant has a preference for HC over MC, while positive values of  $\beta_0$  indicate a preference for MC over  
727 HC. With more negative values of  $\beta_1$ , the probability of a participant choosing HC therefore increases more  
728 steeply, the higher the potential gain in the HC option, relative to MC.

729 Participants reported having received WIN outcomes more often in HC than in MC (see  
730 Supplement 1 - table S6), contradicting objective outcome rates. To control for differences in the  
731 subjective outcome rates, we again fit the logistic functions to each subjects' choice data, now  
732 incorporating subjective outcome probabilities in the prediction. First, each monetary amount offered for  
733 either HC or MC on a given trial was multiplied with the subjectively rated percentage of WINS obtained  
734 in the respective condition (e.g. 1.23€ \* 52% WINS in HC = 0.64€). The ratio of these expected values on  
735 each trial was then log-transformed and used to predict the subjects' choices on each trial. The subjects'  
736 probability to choose HC given equal expected values for HC and MC remained significantly above 50%  
737 ( $MD=65.98\%$ ,  $IQR=50.48$ , Wilcoxon signed-rank  $W=863$ , one-sided  $p=.015$ ), i.e., even when controlling for  
738 differences in subjective winning histories for the two tasks, a preference for HC remained.

739 **Analysis of fMRI Data (Study 2).** fMRI data were analyzed using SPM12<sup>74</sup> in MATLAB R2015a. All  
740 functional volumes were slice-time corrected, spatially realigned, and normalized using the forward  
741 deformation fields as obtained using the unified segmentation approach by coregistration of the  
742 anatomical T1-image to the mean functional image of each individual participant<sup>74</sup>. Normalized images  
743 were resliced with a voxel size of 2\*2\*2 mm and smoothed with an 8-mm full-width-at-half-maximum  
744 isotropic Gaussian kernel. To remove drift, functional images were high-pass-filtered at 1/128 Hz.

745 Statistical analyses were performed in a two-level, mixed-effects approach. The first-level general  
746 linear model (GLM) for each participant included a total of 8 regressors defining the onsets and duration  
747 of the two task phases (MC, HC), the four feedback phases (MC:WIN, MC:noWIN, HC:WIN, HC:noWIN),  
748 and two regressors modelling the phases for pride and happiness ratings. In addition, the six realignment  
749 parameters from the preprocessing as well as their first derivatives were included as regressors of no  
750 interest to account for noise due to head movement.

751 For the analyses at the second level, we focused on the outcome phase of the task by  
752 implementing a within-subjects ANOVA including the individual first-level contrast images for MC:WIN,  
753 MC:noWIN, HC:WIN, and HC:noWIN. Using this approach we computed main effects of condition (HC>MC)  
754 and outcome valence (WIN>noWIN), as well as their interaction ((HC:WIN>HC:noWIN) >  
755 (MC:WIN>MC:noWIN)).

756 **GLM Analysis including Pride and Happiness Ratings as parametric Modulators.** We performed a  
757 second GLM analysis which included two predictors modelling the onsets and durations of the MC and the  
758 HC task on each trial, three different predictors for the task outcomes, and two predictors modelling the  
759 onsets and durations of the pride and happiness ratings. The first of the three outcome predictors  
760 modelled those task outcomes after which pride was rated. The second one modelled those task outcomes  
761 after which happiness was rated. For each of these predictors the respective affect ratings on each trial  
762 were included as parametric modulations to model variability in neural responses related to the subjective  
763 ratings of pride or happiness on each trial. The third outcome regressor modelled those trial outcomes  
764 that were not followed by any affect rating, and thus was not parametrically modulated. As before, the six  
765 realignment parameters as well as their first derivatives were included to account for noise due to head  
766 movement. The first-level contrast images for the parametric modulations of pride and happiness were  
767 then taken to a group-level within-subjects ANOVA in SPM12<sup>74</sup>.

768 **Psychophysiological Interactions (PPI).** In addition to the standard GLM approach, we additionally  
769 performed psychophysiological interaction (PPI) analyses on the first level and aggregated the resulting

770 contrast images for the PPI effect on the second level using one-sample t-tests in order to investigate  
771 changes in functional connectivity between brain regions identified in the within-participants ANOVA.  
772 Precisely, we investigated whether functional connectivity of regions activated more strongly for WIN than  
773 for noWIN would differ between outcomes of a HC as compared MC. For each individual participant, we  
774 defined 4-mm radius spherical ROIs, centered at the nearest local maximum for the contrast WIN>noWIN  
775 and located within 6 mm from the group maximum for the same contrast, separately for the left and right  
776 VS, which is a central structure associated with the processing of rewarding outcomes<sup>24,76</sup>. By computing  
777 the first eigenvariate for all voxels within each of the two individual spheres that showed a positive effect  
778 for WIN>noWIN, we extracted the time course of activations and constructed PPI terms using the contrast  
779 HC>MC<sup>74</sup>. One participant was excluded from the PPI analysis for right VS, because no voxels survived the  
780 predefined threshold for eigenvariate extraction. The PPI term, along with the activation time course from  
781 the (left or right) VS and a regressor modelling the effect of HC>MC was included in a new GLM for each  
782 participant that additionally modelled the two task phases (grids for HC or MC) and rating phases (pride  
783 and happiness) as well as the six realignment parameters from preprocessing and their first derivatives.  
784 First level contrast images of the (left or right) VS PPI analyses were aggregated for all participants in order  
785 to test for changes in functional connectivity on the group level using one-sample t-tests.

786 **Rationale for Masking Procedures.** We created a set of masks used for region-of-interest (ROI)  
787 analyses by performing automated meta-analyses using Neurosynth<sup>52</sup> for the terms *self referential* and  
788 *value*, comprising activation foci of 166 and 470 studies, respectively. Using the SPM12 image calculator<sup>74</sup>,  
789 we created three mutually exclusive image masks, showing brain regions associated with a) the term *self*  
790 *referential*, but not *value* (SELF $\neg$ VALUE), b) with the term *value*, but not *self referential* (VALUE $\neg$ SELF), and  
791 c) the conjunction of both terms (SELF $\cap$ VALUE, covering regions where both meta-analyses showed  
792 overlapping effects). This rationale is in line with a recent meta-analysis showing substantial overlap  
793 between regions associated with processing of SV and self-referential processes<sup>77</sup>. These masks were then  
794 limited to include only clusters with 5 or more contiguous voxels. For a given contrast, we first tested

795 whether there were significant activations within the regions covered by the masks of interest.  
796 Subsequently, we tested whether the same contrast showed significant activations on the whole-brain  
797 level in order to detect regions activated that were located outside of our a-priori masks.

798 **Linking Internal Control-dependent Functional Connectivity to interindividual Variability in**  
799 **affective Responses.** We hypothesized that individuals showing stronger functional connectivity between  
800 VS and regions associated with self-related processing when receiving HC outcomes than when receiving  
801 MC outcomes, should display larger pride responses. We obtained an estimate of individual functional  
802 connectivity strengths by computing the eigenvariate across participants from the three largest clusters  
803 inside the SELF-VALUE mask showing significant PPI effects at  $p < .0005$  (uncorrected at peak level). These  
804 three clusters were located in left AG ( $k=50$  voxels), dmPFC ( $k=89$ ) and precuneus ( $k=33$ ; figure 6). Next,  
805 we correlated pride responses with estimates of functional connectivity in each of the three clusters,  
806 applying FDR correction for multiple comparisons on the resulting  $p$ -values (using the *p.adjust* function in  
807 R<sup>75</sup>). An equivalent analysis was performed for the happiness responses. We then compared these  
808 correlations between pride and happiness using the *cocor* package<sup>78</sup> in R, again applying FDR-correction  
809 for multiple comparisons.



810

### **Acknowledgements**

811 We thank Janine Baumann, Finn Lübber, Timo Schlesinger, and Johanna Schulz for their help with  
812 data collection.

813

814

### **Competing Interests**

815 All authors declare no conflicts of interest.

816

817

### **Author Contributions**

818 D.S.S., F.M.P., L.M.P., and S.K. developed and designed the experiments. D.S.S. programmed the  
819 experiments. D.S.S., F.M.P., and S.K. conducted data collection. D.S.S. performed statistical analyses.  
820 D.S.S., F.M.P., L.M.P., and S.K. interpreted the results. D.S.S., F.M.P., L.M.P., and S.K. wrote the paper.

821

## References

- 822 1. Ryan, R. M. & Deci, E. L. Self-Determination Theory and the Facilitation of Intrinsic Motivation,  
823 Social Development, and Well-Being. *Am. Psychol.* **55**, 68–78 (2000).
- 824 2. Ryff, C. D. Happiness Is Everything , or Is It ? Explorations on the Meaning of Psychological Well-  
825 Being. *J. Pers. Soc. Psychol.* **57**, 1069–1081 (1989).
- 826 3. Leotti, L. A., Iyengar, S. S. & Ochsner, K. N. Born to choose: The origins and value of the need for  
827 control. *Trends Cogn. Sci.* **14**, 457–463 (2010).
- 828 4. Rotter, J. B. Generalized expectancies for internal versus external control of reinforcement.  
829 *Psychol. Monogr. Gen. Appl.* **80**, 1–28 (1966).
- 830 5. Judge, T. A. & Bono, J. E. Relationship of core self-evaluations traits - self-esteem, generalized self-  
831 efficacy, locus of control, and emotional stability - with job satisfaction and job performance: A  
832 meta-analysis. *J. Appl. Psychol.* **86**, 80–92 (2001).
- 833 6. Ajzen, I. Perceived Behavioral Control, Self-Efficacy, Locus of Control, and the Theory of Planned  
834 Behavior1. *J. Appl. Soc. Psychol.* **32**, 665–683 (2002).
- 835 7. Bandura, A. Toward a unifying theory of behavioral change. *Psychological Review* **84**, 191–215  
836 (1977).
- 837 8. Eccles, J. S. & Wigfield, A. Motivational Beliefs, Values, and Goals. *Annu. Rev. Psychol.* **53**, 109–132  
838 (2002).
- 839 9. Guay, F., Senecal, C., Gauthier, L. & Fernet, C. Predicting career indecision: A self-determination  
840 theory perspective. *J. Couns. Psychol.* **50**, 165–177 (2003).
- 841 10. Kadden, R. M. & Litt, M. D. The role of self-efficacy in the treatment of substance use disorders.  
842 *Addict. Behav.* **36**, 1120–1126 (2011).
- 843 11. Muris, P. Relationships between self-efficacy and symptoms of anxiety disorders and depression  
844 in a normal adolescent sample. *Pers. Individ. Dif.* **32**, 337–348 (2002).
- 845 12. Weisz, J. R., Weiss, B., Wasserman, A. A. & Rintoul, B. Control-Related Beliefs and Depression

- 846            Among Clinic-Referred Children and Adolescents. *J. Abnorm. Psychol.* **96**, 58–63 (1987).
- 847    13.    Nolen-Hoeksema, S., Girgus, J. S. & Seligman, M. E. Learned helplessness in children: A  
848            longitudinal study of depression, achievement, and explanatory style. *J. Pers. Soc. Psychol.* **51**,  
849            435–442 (1986).
- 850    14.    World Health Organization. *The ICD-10 Classification of Mental and Behavioural Disorders:*  
851            *Diagnostic Criteria for Research.* (WHO, 1993).
- 852    15.    Bartra, O., McGuire, J. T. & Kable, J. W. The valuation system: A coordinate-based meta-analysis  
853            of BOLD fMRI experiments examining neural correlates of subjective value. *Neuroimage* **76**, 412–  
854            427 (2013).
- 855    16.    Rushworth, M. F. S. & Behrens, T. E. J. Choice, uncertainty and value in prefrontal and cingulate  
856            cortex. *Nat. Neurosci.* **11**, 389–397 (2008).
- 857    17.    Bown, N. J., Read, D. & Summers, B. The Lure of Choice. *J. Behav. Decis. Mak.* **16**, 297–308 (2003).
- 858    18.    Suzuki, S. Effects of number of alternatives on choice in humans. *Behav. Processes* **39**, 205–214  
859            (1997).
- 860    19.    Cockburn, J., Collins, A. G. E. & Frank, M. J. A Reinforcement Learning Mechanism Responsible for  
861            the Valuation of Free Choice. *Neuron* **83**, 551–557 (2014).
- 862    20.    Leotti, L. A. & Delgado, M. R. The Inherent Reward of Choice. *Psychol. Sci.* **22**, 1310–1318 (2011).
- 863    21.    Leotti, L. A. & Delgado, M. R. The Value of Exercising Control Over Monetary Gains and Losses.  
864            *Psychol. Sci.* **25**, 596–604 (2014).
- 865    22.    Knutson, B., Adams, C. M., Fong, G. W. & Hommer, D. Anticipation of Increasing Monetary  
866            Reward Selectively Recruits Nucleus Accumbens. **21**, 1–5 (2001).
- 867    23.    O’Doherty, J. P., Buchanan, T. W., Seymour, B. & Dolan, R. J. Predictive Neural Coding of Reward  
868            Preference Involves Dissociable Responses in Human Ventral Midbrain and Ventral Striatum.  
869            *Neuron* **49**, 157–166 (2006).
- 870    24.    Pagnoni, G., Zink, C. F., Montague, P. R. & Berns, G. S. Activity in human ventral striatum locked to

- 871 errors of reward prediction. *Nat. Neurosci.* **5**, 97–98 (2002).
- 872 25. Pacherie, E. The phenomenology of action: A conceptual framework. *Cognition* **107**, 179–217  
873 (2008).
- 874 26. Ly, V., Wang, K. S., Bhanji, J. & Delgado, M. R. A Reward-Based Framework of Perceived Control.  
875 *Front. Neurosci.* **13**, 1–11 (2019).
- 876 27. Tracy, J. L. & Robins, R. R. W. Putting the Self Into Self-Conscious Emotions: A Theoretical Model.  
877 *Psychol. Inq.* **15**, 103–125 (2004).
- 878 28. Williams, L. A. & DeSteno, D. Pride and perseverance: The motivational role of pride. *J. Pers. Soc.*  
879 *Psychol.* **94**, 1007–1017 (2008).
- 880 29. Tangney, J., Stuewig, J. & Mashek, D. Moral emotions and moral behaviour. *Annu. Rev. Psychol.*  
881 **58**, 345–72 (2007).
- 882 30. Leary, M. R. Motivational and Emotional Aspects of the Self. *Annu. Rev. Psychol.* **58**, 317–344  
883 (2007).
- 884 31. Tracy, J. L. & Robins, R. W. The self in self-conscious emotions: A cognitive appraisal approach.  
885 *self-conscious Emot. Theory Res.* 3–20 (2007).
- 886 32. Tracy, J. L., Cheng, J. T., Robins, R. W. & Trzesniewski, K. H. Authentic and Hubristic Pride: The  
887 Affective Core of Self-esteem and Narcissism. *Self Identity* **8**, 196–213 (2009).
- 888 33. Rutledge, R. B., Skandali, N., Dayan, P. & Dolan, R. J. A computational and neural model of  
889 momentary subjective well-being. *Proc. Natl. Acad. Sci.* 1–6 (2014).  
890 doi:10.1073/pnas.1407535111
- 891 34. Rutledge, R. B., de Berker, A. O., Espenhahn, S., Dayan, P. & Dolan, R. J. The social contingency of  
892 momentary subjective well-being. *Nat. Commun.* **7**, 11825 (2016).
- 893 35. Norton, M. I., Mochon, D. & Ariely, D. The IKEA effect: When labor leads to love. *J. Consum.*  
894 *Psychol.* **22**, 453–460 (2012).
- 895 36. Inzlicht, M., Shenav, A. & Olivola, C. Y. The Effort Paradox: Effort Is Both Costly and Valued.

- 896 *Trends Cogn. Sci.* 1–13 (2018). doi:10.1016/j.tics.2018.01.007
- 897 37. Huys, Q. J. M. & Dayan, P. A Bayesian formulation of behavioral control. *Cognition* **113**, 314–328  
898 (2009).
- 899 38. Clark, A. Predictive brains, situated agents, and the future of cognitive science. *Behav. Brain Sci.*  
900 **36**, 181–253 (2013).
- 901 39. Kim, M. J. *et al.* The structural and functional connectivity of the amygdala: From normal emotion  
902 to pathological anxiety. *Behav. Brain Res.* **223**, 403–410 (2011).
- 903 40. Price, J. L. Definition of the orbital cortex in relation to specific connections with limbic and  
904 visceral structures and other cortical regions. *Ann. N. Y. Acad. Sci.* **1121**, 54–71 (2007).
- 905 41. Clithero, J. A. & Rangel, A. Informatic parcellation of the network involved in the computation of  
906 subjective value. *Soc. Cogn. Affect. Neurosci.* **9**, 1289–1302 (2014).
- 907 42. Maier, S. F. & Seligman, M. E. P. Learned helplessness at fifty: Insights from neuroscience.  
908 *Psychol. Rev.* **123**, 349–367 (2016).
- 909 43. Salomons, T. V. Perceived Controllability Modulates the Neural Response to Pain. *J. Neurosci.* **24**,  
910 7199–7203 (2004).
- 911 44. Bhanji, J. P. & Delgado, M. R. Perceived Control Influences Neural Responses to Setbacks and  
912 Promotes Persistence. *Neuron* **83**, 1369–1375 (2014).
- 913 45. Denny, B. T., Kober, H., Wager, T. D. & Ochsner, K. N. A Meta-analysis of Functional Neuroimaging  
914 Studies of Self- and Other Judgments Reveals a Spatial Gradient for Mentalizing in Medial  
915 Prefrontal Cortex. *J. Cogn. Neurosci.* **24**, 1742–1752 (2012).
- 916 46. van der Meer, L., Costafreda, S., Aleman, A. & David, A. S. Self-reflection and the brain: A  
917 theoretical review and meta-analysis of neuroimaging studies with implications for schizophrenia.  
918 *Neurosci. Biobehav. Rev.* **34**, 935–946 (2010).
- 919 47. Etkin, A., Egner, T. & Kalisch, R. Emotional processing in anterior cingulate and medial prefrontal  
920 cortex. *Trends Cogn. Sci.* **15**, 85–93 (2011).

- 921 48. Roy, M., Shohamy, D. & Wager, T. D. Ventromedial prefrontal-subcortical systems and the  
922 generation of affective meaning. *Trends Cogn. Sci.* **16**, 147–156 (2012).
- 923 49. Tamir, D. I. & Mitchell, J. P. Disclosing information about the self is intrinsically rewarding. *Pnas*  
924 **109**, 8038–8043 (2012).
- 925 50. Kuzmanovic, B., Jefferson, A. & Vogeley, K. The role of the neural reward circuitry in self-  
926 referential optimistic belief updates. *Neuroimage* **133**, 151–162 (2016).
- 927 51. Will, G. J., Rutledge, R. B., Moutoussis, M. & Dolan, R. J. Neural and computational processes  
928 underlying dynamic changes in self-esteem. *Elife* **6**, 1–21 (2017).
- 929 52. Yarkoni, T., Poldrack, R. A., Nichols, T. E., Van Essen, D. C. & Wager, T. D. Large-scale automated  
930 synthesis of human functional neuroimaging data. *Nat. Methods* **8**, 665–670 (2011).
- 931 53. Northoff, G. & Bermpohl, F. Cortical midline structures and the self. *Trends Cogn. Sci.* **8**, 102–107  
932 (2004).
- 933 54. D’Argembeau, A. On the Role of the Ventromedial Prefrontal Cortex in Self-Processing: The  
934 Valuation Hypothesis. *Front. Hum. Neurosci.* **7**, 1–13 (2013).
- 935 55. Lindquist, K. A. Emotions Emerge from More Basic Psychological Ingredients: A Modern  
936 Psychological Constructionist Model. *Emot. Rev.* **5**, 356–368 (2013).
- 937 56. Leek, M. R. Adaptive procedures in psychophysical research. *Percept. Psychophys.* **63**, 1279–1292  
938 (2001).
- 939 57. Tangney, J. P. & Dearing, R. L. *Emotions and social behavior. Shame and guilt.* (2002).
- 940 58. Weidman, A. C., Tracy, J. L. & Elliot, A. J. The Benefits of Following Your Pride: Authentic Pride  
941 Promotes Achievement. *J. Pers.* **84**, 607–622 (2016).
- 942 59. Ullsperger, M. & von Cramon, D. Y. Decision making, performance and outcome monitoring in  
943 frontal cortical areas. *Nat. Neurosci.* **7**, 1173–1174 (2004).
- 944 60. Müller-Pinzler, L. *et al.* Neural pathways of embarrassment and their modulation by social  
945 anxiety. *Neuroimage* **119**, 252–261 (2015).

- 946 61. Seth, A. K. Interoceptive inference, emotion, and the embodied self. *Trends Cogn. Sci.* **17**, 565–  
947 573 (2013).
- 948 62. Chavez, R. S. & Heatherton, T. F. Multimodal frontostriatal connectivity underlies individual  
949 differences in self-esteem. *Soc. Cogn. Affect. Neurosci.* **10**, 364–370 (2013).
- 950 63. Leary, M. R., Tambor, E. S., Terdal, S. K. & Downs, D. L. Self-Esteem as an Interpersonal Monitor:  
951 The Sociometer Hypothesis. *J. Pers. Soc. Psychol.* **68**, 518–530 (1995).
- 952 64. Gilead, M., Katzir, M., Eyal, T. & Liberman, N. Neural correlates of processing ‘self-conscious’ vs.  
953 ‘basic’ emotions. *Neuropsychologia* **81**, 207–218 (2016).
- 954 65. Kuzmanovic, B., Rigoux, L. & Tittgemeyer, M. Influence of vmPFC on dmPFC Predicts Valence-  
955 Guided Belief Formation. *J. Neurosci.* 0266–18 (2018). doi:10.1523/JNEUROSCI.0266-18.2018
- 956 66. Wigfield, A., Eccles, J. S., Mac Iver, D., Reuman, D. A. & Midgley, C. Transitions During Early  
957 Adolescence: Changes in Children’s Domain-Specific Self-Perceptions and General Self-Esteem  
958 Across the Transition to Junior High School. *Dev. Psychol.* **27**, 552–565 (1991).
- 959 67. Joukhador, J., Blaszczynski, A. & Maccallum, F. Superstitious beliefs in gambling among problem  
960 and non-problem gamblers: Preliminary data. *J. Gambl. Stud.* **20**, 171–180 (2004).
- 961 68. Langer, E. J. The illusion of control. *J. Pers. Soc. Psychol.* **32**, 311–328 (1975).
- 962 69. Clark, L. *et al.* Pathological Choice: The Neuroscience of Gambling and Gambling Addiction. *J.*  
963 *Neurosci.* **33**, 17617–17623 (2013).
- 964 70. Wickwire, E. M., Whelan, J. P. & Meyers, A. W. Outcome expectancies and gambling behavior  
965 among urban adolescents. *Psychol. Addict. Behav.* **24**, 75–88 (2010).
- 966 71. Brainard, D. H. The Psychophysics Toolbox. *Spat. Vis.* **10**, 433–436 (1997).
- 967 72. Mathworks Inc, T. MATLAB. (2016).
- 968 73. Team, J. JASP (Version 0.9) [Computer software]. (2019).
- 969 74. Ashburner, J. *et al.* SPM12 Manual. *Functional Imaging Laboratory* 1–500 (2013).  
970 doi:10.1111/j.1365-294X.2006.02813.x

- 971 75. R Core Team. R: A language and environment for statistical computing. (2013).
- 972 76. Delgado, M. R. Reward-Related Responses in the Human Striatum. *Ann. N. Y. Acad. Sci.* **1104**, 70–  
973 88 (2007).
- 974 77. Acikalin, M. Y., Gorgolewski, K. J. & Poldrack, R. A. A Coordinate-Based Meta-Analysis of Overlaps  
975 in Regional Specialization and Functional Connectivity across Subjective Value and Default Mode  
976 Networks. *Front. Neurosci.* **11**, 1–11 (2017).
- 977 78. Diedenhofen, B. Package ‘cocor’. 25 (2016).
- 978
