# Supplementary material for: The Pursuit of Pride: Outcomes achieved under Beliefs of Internal Control shape positive Affect and neural Dynamics in the vmPFC
Source: bioRxiv or medRxiv preprint supplement (doi:10.1101/637207), 2019-06-07
Supplement: Supplementary file [file media-1.pdf]

**Supplement 1.** Supplemental information and statistics for behavioral analyses.

**Table S1.** Repeated measures ANOVA of affect ratings (study 1)

| Within subjects effect               | SSs     | df    | Mean Square | F                  | p     | $\eta_p^2$ |
|--------------------------------------|---------|-------|-------------|--------------------|-------|------------|
| condition                            | 2018.4  | 1.31  | 1545.60     | 28.84 <sup>a</sup> | <.001 | .43        |
| error                                | 2729.2  | 50.93 | 53.59       |                    |       |            |
| outcome valence                      | 79377.8 | 1.00  | 79377.77    | 60.92              | <.001 | .61        |
| error                                | 50819.7 | 39.00 | 1303.07     |                    |       |            |
| affect                               | 9904.4  | 1.00  | 9904.39     | 17.45              | <.001 | .31        |
| error                                | 22142.1 | 39.00 | 567.74      |                    |       |            |
| condition * outcome valence          | 4760.4  | 1.37  | 3466.75     | 48.51 <sup>a</sup> | <.001 | .55        |
| error                                | 3826.8  | 53.55 | 71.46       |                    |       |            |
| condition * affect                   | 389.4   | 1.31  | 297.16      | 12.87 <sup>a</sup> | <.001 | .25        |
| error                                | 1180.4  | 51.11 | 23.10       |                    |       |            |
| outcome * affect                     | 9825.2  | 1.00  | 9825.19     | 70.10              | <.001 | .64        |
| error                                | 5466.4  | 39.00 | 140.16      |                    |       |            |
| condition * outcome valence * affect | 548.5   | 1.29  | 426.98      | 11.44 <sup>a</sup> | <.001 | .23        |
| error                                | 1869.5  | 50.10 | 37.32       |                    |       |            |

**Note.** Type III sum of squares; SSs=Sum of Squares; Results are Greenhouse-Geisser corrected; <sup>a</sup> Mauchly's test indicates deviation from sphericity assumption.

**Table S2.** Repeated measures ANOVA of affect ratings (study 2)

| Within subjects effect               | SSs      | df | Mean Square | F      | p     | $\eta_p^2$ |
|--------------------------------------|----------|----|-------------|--------|-------|------------|
| condition                            | 328.1    | 1  | 328.06      | 8.38   | .006  | .18        |
| error                                | 1487.8   | 38 | 39.15       |        |       |            |
| outcome valence                      | 132177.8 | 1  | 132177.83   | 174.83 | <.001 | .82        |
| error                                | 28728.8  | 38 | 756.02      |        |       |            |
| affect                               | 998.3    | 1  | 998.26      | 12.69  | .001  | .25        |
| error                                | 2989.2   | 38 | 78.66       |        |       |            |
| condition * outcome valence          | 2517.4   | 1  | 2517.41     | 40.23  | <.001 | .51        |
| error                                | 2377.7   | 38 | 62.57       |        |       |            |
| condition * affect                   | 119.7    | 1  | 119.75      | 3.24   | .080  | .08        |
| error                                | 1404.7   | 38 | 36.97       |        |       |            |
| outcome * affect                     | 2009.8   | 1  | 2009.83     | 31.52  | <.001 | .45        |
| error                                | 2423.1   | 38 | 63.76       |        |       |            |
| condition * outcome valence * affect | 249.3    | 1  | 249.26      | 9.08   | .005  | .19        |
| error                                | 1043.6   | 38 | 27.46       |        |       |            |

**Note.** Type III sum of squares; SSs=Sum of Squares.

**Table S3.** Repeated measures ANOVA of pride ratings (study 3)

| Within subjects effect      | SSs   | df | Mean Square | F      | p     | $\eta_p^2$ |
|-----------------------------|-------|----|-------------|--------|-------|------------|
| condition                   | 1917  | 1  | 1916.95     | 18.33  | <.001 | .27        |
| error                       | 5125  | 49 | 104.59      |        |       |            |
| outcome valence             | 30745 | 1  | 30744.92    | 136.19 | <.001 | .74        |
| error                       | 11062 | 49 | 225.76      |        |       |            |
| condition * outcome valence | 3171  | 1  | 3171.08     | 35.98  | <.001 | .42        |
| error                       | 4319  | 49 | 88.15       |        |       |            |

**Note.** Type III sum of squares; SSs=Sum of Squares.

**Table S4.** Reaction times and number of valid trials

|         | condition | Median reaction times<br>(ms) |     | Number of valid trials |      | Number of<br>trials planned |
|---------|-----------|-------------------------------|-----|------------------------|------|-----------------------------|
|         |           | M                             | SD  | M                      | SD   |                             |
| Study 1 | LC        | 751                           | 89  | 29.10                  | 1.11 | 30                          |
|         | MC        | 778                           | 101 | 29.05                  | 0.93 | 30                          |
|         | HC        | 820                           | 90  | 28.56                  | 1.19 | 30                          |
| Study 2 | MC        | 1428                          | 380 | 38.80                  | 1.30 | 40                          |
|         | HC        | 2041                          | 400 | 38.13                  | 1.99 | 40                          |
| Study 3 | MC        | 1223                          | 325 | 30.76                  | 1.24 | 32                          |
|         | HC        | 1218                          | 322 | 31.54                  | 0.73 | 32                          |

**Note.** ms = milliseconds; M = mean; SD = standard deviation; LC = low control; MC = medium control; HC = high control.

**Table S5.** Items regarding subjects' experience of the experimental task (study 3)

| Variable                   | Item                                                                                                                     |
|----------------------------|--------------------------------------------------------------------------------------------------------------------------|
| subjectively received %WIN | How often do you think that you guessed correctly / identified the brightest square in the different tasks? (in percent) |
| difficulty (inv.)          | How easy were the different tasks for you?                                                                               |
| effort                     | How much effort did you put into the different tasks?                                                                    |
| fun                        | How much fun did you have doing the different tasks?                                                                     |
| exciting                   | How exciting / thrilling do you think the different tasks were?                                                          |
| exhausting                 | How exhausting were the different tasks?                                                                                 |

**Table S6.** Rank correlation of pride response and choice preference (study 3)

|                                                       | <i>rho</i> | <i>p</i> <sup>a</sup> | statistics of control variables |  |                        |  |          |                       |
|-------------------------------------------------------|------------|-----------------------|---------------------------------|--|------------------------|--|----------|-----------------------|
|                                                       |            |                       | HC                              |  | MC                     |  | <i>t</i> | <i>p</i> <sup>b</sup> |
|                                                       |            |                       | <i>M</i> ( <i>SD</i> )          |  | <i>M</i> ( <i>SD</i> ) |  |          |                       |
| Correlation of pride response with p(choose HC HC=MC) | .47        | <.001                 |                                 |  |                        |  |          |                       |
| controlling for                                       |            |                       |                                 |  |                        |  |          |                       |
| subjectively received %WIN                            | .47        | <.001                 | 54.51 (12.07)                   |  | 46.66 (11.75)          |  | 5.34     | <.001                 |
| difficulty                                            | .49        | <.001                 | 55.16 (13.83)                   |  | 38.90 (26.15)          |  | 3.93     | <.001                 |
| effort                                                | .44        | <.001                 | 81.26 (12.50)                   |  | 45.05 (28.03)          |  | 9.02     | <.001                 |
| exhausting                                            | .42        | .001                  | 62.15 (17.51)                   |  | 21.65 (24.18)          |  | 10.01    | <.001                 |
| fun                                                   | .41        | .002                  | 62.58 (17.92)                   |  | 36.83 (18.96)          |  | 8.12     | <.001                 |
| exciting                                              | .51        | <.001                 | 58.13 (23.14)                   |  | 30.45 (22.82)          |  | 7.07     | <.001                 |

**Note.** *rho* = (partial) correlation coefficients computed using rank transformed variables; HC = high control; MC = medium control; *M* = mean; *SD* = standard deviation; a = one-sided; b = two-sided.
