# Supplementary material for: The Pursuit of Pride: Outcomes achieved under Beliefs of Internal Control shape positive Affect and neural Dynamics in the vmPFC
Source: bioRxiv or medRxiv preprint supplement (doi:10.1101/637207), 2019-06-07
Supplement: Supplementary file [file media-2.pdf]

**Supplement 2.** Coordinates and full statistics for fMRI analyses.

**Table S7.** WIN>noWIN small-volume-corrected inside VALUE $\neg$ SELF, critical T = 3.881

| set      |          | cluster        |                |          |                | peak           |                | MNI coordinates (mm) |          |                |          |          |          |
|----------|----------|----------------|----------------|----------|----------------|----------------|----------------|----------------------|----------|----------------|----------|----------|----------|
| <i>p</i> | <i>c</i> | <i>p</i> (FWE) | <i>p</i> (FDR) | <i>k</i> | <i>p</i> (unc) | <i>p</i> (FWE) | <i>p</i> (FDR) | <i>T</i>             | <i>Z</i> | <i>p</i> (unc) | <i>x</i> | <i>y</i> | <i>z</i> |
| <.001    | 11       | <.001          | .002           | 235      | <.001          | <.001          | <.001          | 8.18                 | 7.24     | <.001          | -14      | 8        | -10      |
|          |          | .002           | .108           | 61       | .039           | <.001          | <.001          | 8.14                 | 7.21     | <.001          | -2       | 58       | 0        |
|          |          |                |                |          |                | <.001          | <.001          | 7.18                 | 6.51     | <.001          | 2        | 56       | 0        |
|          |          |                |                |          |                | <.001          | .003           | 5.58                 | 5.24     | <.001          | 4        | 50       | -6       |
|          |          | <.001          | .002           | 233      | <.001          | <.001          | <.001          | 7.69                 | 6.89     | <.001          | 16       | 4        | -12      |
|          |          | <.001          | .032           | 108      | .009           | <.001          | <.001          | 6.71                 | 6.15     | <.001          | -2       | 44       | -6       |
|          |          |                |                |          |                | .001           | .016           | 5.11                 | 4.84     | <.001          | -4       | 44       | -12      |
|          |          |                |                |          |                | .001           | .030           | 4.93                 | 4.68     | <.001          | 2        | 46       | -12      |
|          |          | .041           | .811           | 1        | .811           | <.001          | .002           | 5.83                 | 5.44     | <.001          | 0        | 44       | 0        |
|          |          | .015           | .613           | 14       | .297           | <.001          | .003           | 5.68                 | 5.32     | <.001          | -2       | -32      | 38       |
|          |          | .017           | .613           | 12       | .334           | <.001          | .003           | 5.59                 | 5.24     | <.001          | 4        | 48       | -2       |
|          |          |                |                |          |                | <.001          | .004           | 5.48                 | 5.15     | <.001          | 2        | 46       | 2        |
|          |          |                |                |          |                | <.001          | .005           | 5.40                 | 5.08     | <.001          | 0        | 44       | 6        |
|          |          | .033           | .811           | 3        | .647           | .012           | .269           | 4.31                 | 4.14     | <.001          | -2       | 40       | 10       |
|          |          | .036           | .811           | 2        | .718           | .012           | .269           | 4.30                 | 4.13     | <.001          | -10      | 52       | -2       |
|          |          | .041           | .811           | 1        | .811           | .019           | .396           | 4.17                 | 4.02     | <.001          | -2       | 48       | 10       |
|          |          | .041           | .811           | 1        | .811           | .033           | .659           | 4.01                 | 3.87     | <.001          | -2       | 48       | -14      |

**Table S8.** WIN>noWIN small-volume-corrected inside SELF  $\cap$  VALUE, critical T = 4.866

| set      |          | cluster        |                |          |                | peak           |                |          | MNI coordinates (mm) |                |          |          |          |
|----------|----------|----------------|----------------|----------|----------------|----------------|----------------|----------|----------------------|----------------|----------|----------|----------|
| <i>p</i> | <i>c</i> | <i>p</i> (FWE) | <i>p</i> (FDR) | <i>k</i> | <i>p</i> (unc) | <i>p</i> (FWE) | <i>p</i> (FDR) | <i>T</i> | <i>Z</i>             | <i>p</i> (unc) | <i>x</i> | <i>y</i> | <i>z</i> |
| <.001    | 3        | <.001          | .001           | 111      | <.001          | <.001          | <.001          | 7.60     | 6.82                 | <.001          | -2       | 48       | -4       |
|          |          |                |                |          |                | <.001          | .021           | 5.86     | 5.47                 | <.001          | -6       | 46       | -4       |
|          |          | <.001          | .592           | 2        | .592           | <.001          | .005           | 6.29     | 5.82                 | <.001          | -6       | 54       | -4       |
|          |          | <.001          | .592           | 3        | .503           | <.001          | .034           | 5.69     | 5.33                 | <.001          | 0        | -34      | 36       |

**Table S9.** WIN>noWIN wholebrain *p*<.05, FWE-corrected

| set      |          | cluster        |                |          |                | peak           |                |          | MNI coordinates (mm) |                |          |          |          |    |
|----------|----------|----------------|----------------|----------|----------------|----------------|----------------|----------|----------------------|----------------|----------|----------|----------|----|
| <i>p</i> | <i>c</i> | <i>p</i> (FWE) | <i>p</i> (FDR) | <i>k</i> | <i>p</i> (unc) | <i>p</i> (FWE) | <i>p</i> (FDR) | <i>T</i> | <i>Z</i>             | <i>p</i> (unc) | <i>x</i> | <i>y</i> | <i>z</i> |    |
| <.001    | 12       | <.001          | <.001          | 175      | <.001          | <.001          | <.001          | 8.18     | 7.24                 | <.001          | -14      | 8        | -10      |    |
|          |          | <.001          | <.001          | 598      | <.001          | <.001          | <.001          | 8.14     | 7.21                 | <.001          | -2       | 58       | 0        |    |
|          |          | <.001          | <.001          | 1425     | <.001          | <.001          | <.001          | 8.12     | 7.20                 | <.001          | 12       | -88      | 2        |    |
|          |          | <.001          | <.001          |          | <.001          | <.001          | <.001          | 7.23     | 6.54                 | <.001          | 12       | -76      | -10      |    |
|          |          | <.001          | <.001          |          | <.001          | .002           | <.001          | 6.77     | 6.20                 | <.001          | 14       | -94      | 22       |    |
|          |          | <.001          | <.001          | 175      | <.001          | <.001          | <.001          | 7.69     | 6.89                 | <.001          | 16       | 4        | -12      |    |
|          |          | <.001          | <.001          | 163      | <.001          | <.001          | .018           | 6.15     | 5.70                 | <.001          | 0        | -34      | 30       |    |
|          |          |                |                |          |                |                | .002           | .068     | 5.68                 | 5.32           | <.001    | -2       | -32      | 38 |
|          |          | .005           | .127           | 19       | .095           | .001           | .039           | 5.90     | 5.50                 | <.001          | -50      | -56      | -20      |    |
|          |          | <.001          | .005           | 78       | .002           | .001           | .039           | 5.87     | 5.47                 | <.001          | 0        | -10      | 10       |    |
|          |          | <.001          | .015           | 54       | .009           | .002           | .062           | 5.72     | 5.35                 | <.001          | 0        | -76      | 50       |    |
|          |          | .014           | .321           | 8        | .267           | .006           | .135           | 5.44     | 5.12                 | <.001          | 28       | -40      | -48      |    |
|          |          | .002           | .062           | 30       | .041           | .010           | .217           | 5.30     | 5.00                 | <.001          | 2        | -72      | 34       |    |
|          |          | .019           | .416           | 5        | .381           | .020           | .411           | 5.13     | 4.85                 | <.001          | -34      | -78      | -22      |    |
| .025     | .503     | 3              | .503           | .030     | .617           | 5.01           | 4.75           | <.001    | -2                   | -98            | 6        |          |          |    |

**Table S10.** HC>MC small-volume-corrected inside SELF→VALUE, critical T = 4.027

| set      |          | cluster        |                |          |                | peak           |                |          | MNI coordinates (mm) |                |          |          |          |    |
|----------|----------|----------------|----------------|----------|----------------|----------------|----------------|----------|----------------------|----------------|----------|----------|----------|----|
| <i>p</i> | <i>c</i> | <i>p</i> (FWE) | <i>p</i> (FDR) | <i>k</i> | <i>p</i> (unc) | <i>p</i> (FWE) | <i>p</i> (FDR) | <i>T</i> | <i>Z</i>             | <i>p</i> (unc) | <i>x</i> | <i>y</i> | <i>z</i> |    |
| <.001    | 12       | <.001          | .004           | 208      | <.001          | <.001          | <.001          | 6.61     | 6.07                 | <.001          | -8       | -58      | 20       |    |
|          |          |                |                |          |                | <.001          | <.001          | 6.55     | 6.02                 | <.001          | -12      | -56      | 14       |    |
|          |          |                |                |          |                | <.001          | <.001          | 6.31     | 5.83                 | <.001          | -6       | -56      | 14       |    |
|          |          |                |                |          |                |                | <.001          | <.001    | 6.30                 | 5.82           | <.001    | -6       | -60      | 24 |
|          |          | .007           | .527           | 27       | .132           | <.001          | <.001          | 6.34     | 5.85                 | <.001          | -8       | 50       | -12      |    |
|          |          | <.001          | .036           | 108      | .006           | <.001          | <.001          | 6.27     | 5.80                 | <.001          | -2       | 38       | 4        |    |
|          |          | .014           | .649           | 14       | .270           | <.001          | .005           | 5.60     | 5.25                 | <.001          | -6       | -50      | 6        |    |
|          |          | .040           | .798           | 1        | .798           | .001           | .049           | 5.01     | 4.75                 | <.001          | -10      | 46       | -10      |    |
|          |          | .011           | .649           | 17       | .226           | .002           | .073           | 4.88     | 4.64                 | <.001          | -48      | -70      | 26       |    |
|          |          | .035           | .798           | 2        | .699           | .003           | .098           | 4.78     | 4.56                 | <.001          | -4       | 46       | -14      |    |
|          |          | .035           | .798           | 2        | .699           | .012           | .333           | 4.43     | 4.25                 | <.001          | 0        | 48       | -14      |    |
|          |          | .032           | .798           | 3        | .626           | .013           | .333           | 4.41     | 4.23                 | <.001          | 8        | 54       | 24       |    |
|          |          | .035           | .798           | 2        | .699           | .018           | .442           | 4.31     | 4.14                 | <.001          | -8       | 50       | 16       |    |
|          |          | .040           | .798           | 1        | .798           | .026           | .574           | 4.22     | 4.06                 | <.001          | 4        | 46       | -14      |    |
|          |          | .026           | .798           | 5        | .518           | .037           | .747           | 4.12     | 3.97                 | <.001          | 6        | 50       | -14      |    |

**Table S11.** HC>MC small-volume-corrected inside SELF∩VALUE, critical T = 3.182

| set      |          | cluster        |                |          |                | peak           |                |          | MNI coordinates (mm) |                |          |          |          |
|----------|----------|----------------|----------------|----------|----------------|----------------|----------------|----------|----------------------|----------------|----------|----------|----------|
| <i>p</i> | <i>c</i> | <i>p</i> (FWE) | <i>p</i> (FDR) | <i>k</i> | <i>p</i> (unc) | <i>p</i> (FWE) | <i>p</i> (FDR) | <i>T</i> | <i>Z</i>             | <i>p</i> (unc) | <i>x</i> | <i>y</i> | <i>z</i> |
| .050     | 1        | .001           | .016           | 162      | .016           | <.001          | <.001          | 6.13     | 5.69                 | <.001          | -8       | 48       | -12      |
|          |          |                |                |          |                | <.001          | <.001          | 5.81     | 5.42                 | <.001          | -10      | 50       | -8       |
|          |          |                |                |          |                | <.001          | .020           | 4.62     | 4.41                 | <.001          | 0        | 42       | 4        |
|          |          |                |                |          |                | <.001          | .020           | 4.60     | 4.40                 | <.001          | 0        | 40       | 0        |
|          |          |                |                |          |                | .002           | .066           | 4.22     | 4.06                 | <.001          | -8       | 44       | 0        |
|          |          |                |                |          |                | .004           | .118           | 4.00     | 3.86                 | <.001          | 8        | 50       | -8       |
|          |          |                |                |          |                | .007           | .167           | 3.85     | 3.72                 | <.001          | -6       | 54       | -4       |
|          |          |                |                |          |                | .010           | .213           | 3.73     | 3.62                 | <.001          | -8       | 50       | 0        |
|          |          |                |                |          |                | .039           | .785           | 3.27     | 3.19                 | .001           | -14      | 48       | -4       |

**Table S12.** HC>MC wholebrain  $p < .05$ , FWE-corrected

| set   |      | cluster   |           |      |           | peak      |           | MNI coordinates (mm) |      |           |       |     |     |    |
|-------|------|-----------|-----------|------|-----------|-----------|-----------|----------------------|------|-----------|-------|-----|-----|----|
| $p$   | $c$  | $p$ (FWE) | $p$ (FDR) | $k$  | $p$ (unc) | $p$ (FWE) | $p$ (FDR) | $T$                  | $Z$  | $p$ (unc) | x     | y   | z   |    |
| <.001 | 13   | <.001     | <.001     | 392  | <.001     | <.001     | <.001     | 7.54                 | 6.78 | <.001     | 2     | -70 | -34 |    |
|       |      |           |           |      |           | <.001     | .024      | 6.08                 | 5.65 | <.001     | 12    | -68 | -18 |    |
|       |      |           |           |      |           | .004      | .159      | 5.56                 | 5.22 | <.001     | 0     | -68 | -16 |    |
|       |      | <.001     | <.001     | 499  | <.001     | <.001     | .002      | 6.93                 | 6.32 | <.001     | -8    | -56 | 14  |    |
|       |      |           |           |      |           |           | .017      | .518                 | 5.17 | 4.89      | <.001 | -6  | -48 | 24 |
|       |      | <.001     | .018      | 59   | .007      | <.001     | .012      | 6.34                 | 5.85 | <.001     | -8    | 50  | -12 |    |
|       |      | <.001     | .003      | 107  | .001      | <.001     | .012      | 6.33                 | 5.85 | <.001     | 10    | -52 | 14  |    |
|       |      | <.001     | .004      | 93   | .001      | <.001     | .013      | 6.27                 | 5.80 | <.001     | -2    | 38  | 4   |    |
|       |      | .006      | .229      | 16   | .123      | .017      | .518      | 5.16                 | 4.88 | <.001     | -22   | -48 | -14 |    |
|       |      | .006      | .229      | 16   | .123      | .022      | .619      | 5.09                 | 4.82 | <.001     | 58    | -28 | 26  |    |
|       |      | .022      | .629      | 4    | .435      | .025      | .619      | 5.06                 | 4.80 | <.001     | 12    | -64 | -44 |    |
|       |      | .022      | .629      | 4    | .435      | .025      | .619      | 5.06                 | 4.79 | <.001     | 56    | -52 | 6   |    |
|       |      | .025      | .654      | 3    | .503      | .033      | .780      | 4.98                 | 4.73 | <.001     | 24    | -48 | -24 |    |
|       |      | .036      | .719      | 1    | .719      | .042      | .934      | 4.91                 | 4.67 | <.001     | 16    | -60 | -48 |    |
|       |      | .036      | .719      | 1    | .719      | .047      | .949      | 4.88                 | 4.64 | <.001     | -48   | -70 | 26  |    |
| .036  | .719 | 1         | .719      | .048 | .949      | 4.88      | 4.64      | <.001                | -30  | -34       | -18   |     |     |    |

**Table S13.** 3-way conjunction small-volume-corrected inside SELF  $\cap$  VALUE, critical  $T = 3.182$

| set  |     | cluster   |           |     |           | peak      |           | MNI coordinates (mm) |      |           |    |    |     |
|------|-----|-----------|-----------|-----|-----------|-----------|-----------|----------------------|------|-----------|----|----|-----|
| $p$  | $c$ | $p$ (FWE) | $p$ (FDR) | $k$ | $p$ (unc) | $p$ (FWE) | $p$ (FDR) | $T$                  | $Z$  | $p$ (unc) | x  | y  | z   |
| .050 | 1   | .025      | .502      | 11  | .502      | .023      | .456      | 3.45                 | 3.36 | <.001     | -4 | 48 | -10 |

**Note.** Effects listed are for the contrast [HC:WIN>HC:noWIN]  $\cap$  [HC:WIN>MC:WIN]  $\cap$  [HC:WIN>MC:noWIN]

**Table S14.** parametric modulation HAPPY small-volume-corrected inside VALUE $\rightarrow$ SELF, critical T = 4.237

| set      |          | cluster        |                |          |                | peak           |                |          | MNI coordinates (mm) |                |          |          |          |
|----------|----------|----------------|----------------|----------|----------------|----------------|----------------|----------|----------------------|----------------|----------|----------|----------|
| <i>p</i> | <i>c</i> | <i>p</i> (FWE) | <i>p</i> (FDR) | <i>k</i> | <i>p</i> (unc) | <i>p</i> (FWE) | <i>p</i> (FDR) | <i>T</i> | <i>Z</i>             | <i>p</i> (unc) | <i>x</i> | <i>y</i> | <i>z</i> |
| .050     | 1        | .028           | .556           | 3        | .556           | .022           | .434           | 4.55     | 4.04                 | <.001          | 16       | 2        | -12      |

**Table S15.** parametric modulation HAPPY small-volume-corrected inside SELF  $\cap$  VALUE, critical T = 3.397

| set      |          | cluster        |                |          |                | peak           |                |          | MNI coordinates (mm) |                |          |          |          |
|----------|----------|----------------|----------------|----------|----------------|----------------|----------------|----------|----------------------|----------------|----------|----------|----------|
| <i>p</i> | <i>c</i> | <i>p</i> (FWE) | <i>p</i> (FDR) | <i>k</i> | <i>p</i> (unc) | <i>p</i> (FWE) | <i>p</i> (FDR) | <i>T</i> | <i>Z</i>             | <i>p</i> (unc) | <i>x</i> | <i>y</i> | <i>z</i> |
| .001     | 2        | .019           | .738           | 13       | .369           | .002           | .083           | 4.60     | 4.08                 | <.001          | -2       | 48       | -4       |
|          |          | .042           | .835           | 1        | .835           | .021           | .419           | 3.74     | 3.43                 | <.001          | -6       | 46       | -4       |

**Table S16.** parametric modulation HAPPY wholebrain *p* <.0001, uncorrected

| set      |          | cluster        |                |          |                | peak           |                |          | MNI coordinates (mm) |                |          |          |          |
|----------|----------|----------------|----------------|----------|----------------|----------------|----------------|----------|----------------------|----------------|----------|----------|----------|
| <i>p</i> | <i>c</i> | <i>p</i> (FWE) | <i>p</i> (FDR) | <i>k</i> | <i>p</i> (unc) | <i>p</i> (FWE) | <i>p</i> (FDR) | <i>T</i> | <i>Z</i>             | <i>p</i> (unc) | <i>x</i> | <i>y</i> | <i>z</i> |
| <.001    | 9        | .009           | .041           | 91       | .005           | .028           | .128           | 5.81     | 4.89                 | <.001          | 8        | -88      | 6        |
|          |          | .047           | .105           | 53       | .023           | .177           | .410           | 5.08     | 4.41                 | <.001          | -4       | 60       | 10       |
|          |          |                |                |          |                | .727           | .680           | 4.31     | 3.87                 | <.001          | -14      | 64       | 10       |
|          |          | .201           | .327           | 24       | .109           | .255           | .454           | 4.92     | 4.30                 | <.001          | 6        | -76      | -10      |
|          |          | .450           | .517           | 10       | .290           | .351           | .454           | 4.77     | 4.19                 | <.001          | 20       | -88      | -14      |
|          |          | .335           | .445           | 15       | .198           | .470           | .573           | 4.61     | 4.08                 | <.001          | -4       | 48       | -2       |
|          |          | .508           | .517           | 8        | .344           | .523           | .584           | 4.55     | 4.04                 | <.001          | 16       | 2        | -12      |
|          |          | .794           | .766           | 1        | .766           | .696           | .680           | 4.35     | 3.89                 | <.001          | 20       | -88      | 34       |
|          |          | .651           | .575           | 4        | .511           | .703           | .680           | 4.34     | 3.89                 | <.001          | 14       | -98      | 8        |
| .651     | .575     | 4              | .511           | .754     | .680           | 4.28           | 3.84           | <.001    | 26                   | -90            | 22       |          |          |

**Table S17.** parametric modulation PROUD small-volume-corrected inside VALUE $\rightarrow$ SELF, critical T = 4.175

| set      |          | cluster        |                |          |                | peak           |                | MNI coordinates (mm) |          |                |          |          |          |
|----------|----------|----------------|----------------|----------|----------------|----------------|----------------|----------------------|----------|----------------|----------|----------|----------|
| <i>p</i> | <i>c</i> | <i>p</i> (FWE) | <i>p</i> (FDR) | <i>k</i> | <i>p</i> (unc) | <i>p</i> (FWE) | <i>p</i> (FDR) | <i>T</i>             | <i>Z</i> | <i>p</i> (unc) | <i>x</i> | <i>y</i> | <i>z</i> |
| <.001    | 7        | .009           | .801           | 22       | .175           | <.001          | .031           | 6.15                 | 5.09     | <.001          | -2       | 56       | 0        |
|          |          | .023           | .801           | 7        | .444           | .002           | .159           | 5.34                 | 4.58     | <.001          | 20       | 6        | -14      |
|          |          | .012           | .801           | 16       | .245           | .008           | .306           | 4.86                 | 4.26     | <.001          | -2       | 44       | -6       |
|          |          | .040           | .801           | 1        | .801           | .031           | .953           | 4.35                 | 3.90     | <.001          | -12      | 2        | -10      |
|          |          | .040           | .801           | 1        | .801           | .041           | .953           | 4.25                 | 3.82     | <.001          | -16      | 10       | -8       |
|          |          | .035           | .801           | 2        | .703           | .043           | .953           | 4.23                 | 3.81     | <.001          | 18       | 14       | -4       |
|          |          | .040           | .801           | 1        | .801           | .048           | .953           | 4.19                 | 3.78     | <.001          | -20      | 10       | -6       |

**Table S18.** parametric modulation PROUD small-volume-corrected inside SELF $\rightarrow$ VALUE critical T = 4.353

| set      |          | cluster        |                |          |                | peak           |                | MNI coordinates (mm) |          |                |          |          |          |
|----------|----------|----------------|----------------|----------|----------------|----------------|----------------|----------------------|----------|----------------|----------|----------|----------|
| <i>p</i> | <i>c</i> | <i>p</i> (FWE) | <i>p</i> (FDR) | <i>k</i> | <i>p</i> (unc) | <i>p</i> (FWE) | <i>p</i> (FDR) | <i>T</i>             | <i>Z</i> | <i>p</i> (unc) | <i>x</i> | <i>y</i> | <i>z</i> |
| .050     | 1        | <.001          | .003           | 122      | .003           | .001           | .020           | 5.96                 | 4.98     | <.001          | -2       | 56       | 2        |
|          |          |                |                |          |                | .004           | .074           | 5.27                 | 4.54     | <.001          | -2       | 62       | 10       |

**Table S19.** parametric modulation PROUD small-volume-corrected inside SELF  $\cap$  VALUE, critical T = 3.343

| set      |          | cluster        |                |          |                | peak           |                | MNI coordinates (mm) |          |                |          |          |          |
|----------|----------|----------------|----------------|----------|----------------|----------------|----------------|----------------------|----------|----------------|----------|----------|----------|
| <i>p</i> | <i>c</i> | <i>p</i> (FWE) | <i>p</i> (FDR) | <i>k</i> | <i>p</i> (unc) | <i>p</i> (FWE) | <i>p</i> (FDR) | <i>T</i>             | <i>Z</i> | <i>p</i> (unc) | <i>x</i> | <i>y</i> | <i>z</i> |
| <.001    | 3        | .003           | .163           | 96       | .054           | .001           | .036           | 4.83                 | 4.24     | <.001          | -4       | 48       | -6       |
|          |          |                |                |          |                | .001           | .036           | 4.78                 | 4.21     | <.001          | 0        | 42       | -6       |
|          |          | .043           | .870           | 2        | .802           | .002           | .045           | 4.58                 | 4.06     | <.001          | -6       | 54       | -4       |
|          |          | .046           | .870           | 1        | .870           | .021           | .392           | 3.69                 | 3.39     | <.001          | -8       | 50       | 0        |

**Table S20.** parametric modulation PROUD wholebrain  $p < .0001$ , uncorrected

| set  |     | cluster         |                 |     |                 | peak            |                 |      | MNI coordinates (mm) |                 |     |     |     |
|------|-----|-----------------|-----------------|-----|-----------------|-----------------|-----------------|------|----------------------|-----------------|-----|-----|-----|
| $p$  | $c$ | $p(\text{FWE})$ | $p(\text{FDR})$ | $k$ | $p(\text{unc})$ | $p(\text{FWE})$ | $p(\text{FDR})$ | $T$  | $Z$                  | $p(\text{unc})$ | $x$ | $y$ | $z$ |
| .001 | 7   | <.001           | .001            | 269 | <.001           | .008            | .061            | 6.15 | 5.09                 | <.001           | -2  | 56  | 0   |
|      |     |                 |                 |     |                 | .084            | .159            | 5.27 | 4.54                 | <.001           | -2  | 62  | 10  |
|      |     |                 |                 |     |                 | .221            | .301            | 4.86 | 4.26                 | <.001           | -2  | 44  | -6  |
|      |     | .293            | .532            | 18  | .228            | .071            | .159            | 5.34 | 4.58                 | <.001           | 20  | 6   | -14 |
|      |     | .014            | .032            | 102 | .009            | .084            | .159            | 5.27 | 4.54                 | <.001           | 16  | -78 | -8  |
|      |     |                 |                 |     |                 | .109            | .167            | 5.16 | 4.47                 | <.001           | 10  | -88 | 0   |
|      |     | .371            | .532            | 13  | .304            | .424            | .498            | 4.54 | 4.03                 | <.001           | -20 | 12  | -4  |
|      |     | .661            | .710            | 2   | .710            | .584            | .703            | 4.35 | 3.90                 | <.001           | -12 | 2   | -10 |
|      |     | .661            | .710            | 2   | .710            | .668            | .762            | 4.25 | 3.82                 | <.001           | -16 | 10  | -8  |
|      |     | .588            | .710            | 4   | .581            | .687            | .762            | 4.23 | 3.81                 | <.001           | 18  | 14  | -4  |

**Table S21.** left nACC PPI small-volume-corrected inside SELF-VALUE, critical  $T = 4.376$ 

| set  |     | cluster         |                 |     |                 | peak            |                 |      | MNI coordinates (mm) |                 |      |      |      |
|------|-----|-----------------|-----------------|-----|-----------------|-----------------|-----------------|------|----------------------|-----------------|------|------|------|
| $p$  | $c$ | $p(\text{FWE})$ | $p(\text{FDR})$ | $k$ | $p(\text{unc})$ | $p(\text{FWE})$ | $p(\text{FDR})$ | $T$  | $Z$                  | $p(\text{unc})$ | $x$  | $y$  | $z$  |
| .001 | 2   | .006            | .244            | 24  | .122            | .001            | .079            | 5.64 | 4.76                 | <.001           | -46  | -70  | 38   |
|      |     |                 |                 |     |                 | .003            | .079            | 5.42 | 4.62                 | <.001           | -42  | -72  | 40   |
|      |     |                 |                 |     |                 | .034            | .670            | 2    | .670                 | .007            | .143 | 5.07 | 4.39 |

**Table S22.** left nACC PPI small-volume-corrected inside SELF  $\cap$  VALUE critical T = 3.360

| set      |          | cluster        |                |          |                | peak           |                | MNI coordinates (mm) |          |                |          |          |          |      |    |    |   |
|----------|----------|----------------|----------------|----------|----------------|----------------|----------------|----------------------|----------|----------------|----------|----------|----------|------|----|----|---|
| <i>p</i> | <i>c</i> | <i>p</i> (FWE) | <i>p</i> (FDR) | <i>k</i> | <i>p</i> (unc) | <i>p</i> (FWE) | <i>p</i> (FDR) | <i>T</i>             | <i>Z</i> | <i>p</i> (unc) | <i>x</i> | <i>y</i> | <i>z</i> |      |    |    |   |
| <.001    | 4        | .033           | .863           | 5        | .649           | .010           | .863           | 4.00                 | 3.62     | <.001          | -12      | 50       | 6        |      |    |    |   |
|          |          | .007           | .569           | 48       | .142           | .017           | .863           | 3.80                 | 3.47     | <.001          | 6        | 48       | -14      |      |    |    |   |
|          |          |                |                |          |                | .026           | .863           | 3.62                 | 3.33     | <.001          | 0        | 50       | -12      |      |    |    |   |
|          |          |                |                |          |                | .032           | .863           | 3.54                 | 3.27     | .001           | -4       | 54       | -6       |      |    |    |   |
|          |          | .029           | .863           | 7        | .583           | .032           | .863           | 3.54                 | 3.27     | .001           | -8       | 46       | 0        |      |    |    |   |
|          |          |                |                |          |                | .039           | .863           | 3.46                 | 3.20     | .001           | -12      | 46       | 2        |      |    |    |   |
|          |          |                |                |          |                | .044           | .867           | 3.42                 | 3.17     | .001           | -8       | 44       | -4       |      |    |    |   |
|          |          |                |                |          |                | .043           | .863           | 1                    | .863     | .038           | .863     | 3.48     | 3.21     | .001 | -8 | 50 | 0 |

**Table S23.** left nACC PPI wholebrain  $p < .001$ , uncorrected,  $k \geq 50$ 

| set      |          | cluster        |                |          |                | peak           |                | MNI coordinates (mm) |          |                |          |          |          |
|----------|----------|----------------|----------------|----------|----------------|----------------|----------------|----------------------|----------|----------------|----------|----------|----------|
| <i>p</i> | <i>c</i> | <i>p</i> (FWE) | <i>p</i> (FDR) | <i>k</i> | <i>p</i> (unc) | <i>p</i> (FWE) | <i>p</i> (FDR) | <i>T</i>             | <i>Z</i> | <i>p</i> (unc) | <i>x</i> | <i>y</i> | <i>z</i> |
| <.001    | 7        | .009           | .020           | 329      | .001           | .035           | .481           | 5.67                 | 4.78     | <.001          | -44      | -70      | 40       |
|          |          | <.001          | <.001          | 3147     | <.001          | .171           | .612           | 5.02                 | 4.36     | <.001          | 22       | 28       | 38       |
|          |          |                |                |          |                | .174           | .612           | 5.01                 | 4.35     | <.001          | -8       | 46       | 50       |
|          |          |                |                |          |                | .249           | .612           | 4.85                 | 4.24     | <.001          | -14      | 52       | 12       |
|          |          | .307           | .407           | 103      | .042           | .698           | .612           | 4.26                 | 3.82     | <.001          | -44      | 24       | -14      |
|          |          |                |                |          |                | .765           | .612           | 4.18                 | 3.76     | <.001          | -34      | 26       | -14      |
|          |          | .634           | .576           | 58       | .115           | .718           | .612           | 4.23                 | 3.80     | <.001          | 46       | -64      | 42       |
|          |          | .625           | .576           | 59       | .112           | .775           | .612           | 4.16                 | 3.75     | <.001          | -14      | 12       | 6        |
|          |          | .422           | .487           | 84       | .062           | .891           | .679           | 3.99                 | 3.61     | <.001          | 0        | -56      | 16       |
|          |          | .054           | .083           | 207      | .006           | .914           | .690           | 3.94                 | 3.58     | <.001          | -4       | -48      | 42       |
|          |          |                |                |          |                | .943           | .723           | 3.87                 | 3.52     | <.001          | 4        | -56      | 36       |
|          |          |                |                |          |                | .983           | .740           | 3.71                 | 3.40     | <.001          | 6        | -46      | 40       |



**Table S24.** right nACC PPI small-volume-corrected inside SELF-VALUE, critical T = 4.373

| set      |          | cluster        |                |          |                | peak           |                |          | MNI coordinates (mm) |                |          |          |          |
|----------|----------|----------------|----------------|----------|----------------|----------------|----------------|----------|----------------------|----------------|----------|----------|----------|
| <i>p</i> | <i>c</i> | <i>p</i> (FWE) | <i>p</i> (FDR) | <i>k</i> | <i>p</i> (unc) | <i>p</i> (FWE) | <i>p</i> (FDR) | <i>T</i> | <i>Z</i>             | <i>p</i> (unc) | <i>x</i> | <i>y</i> | <i>z</i> |
| .001     | 2        | .026           | .766           | 4        | .512           | .028           | .821           | 4.59     | 4.07                 | <.001          | -18      | 38       | 46       |
|          |          | .039           | .766           | 1        | .766           | .041           | .821           | 4.44     | 3.96                 | <.001          | 0        | 36       | 32       |

**Table S25.** right nACC PPI wholebrain *p*<.001, uncorrected, *k*>=50

| set      |          | cluster        |                |          |                | peak           |                |          | MNI coordinates (mm) |                |          |          |          |
|----------|----------|----------------|----------------|----------|----------------|----------------|----------------|----------|----------------------|----------------|----------|----------|----------|
| <i>p</i> | <i>c</i> | <i>p</i> (FWE) | <i>p</i> (FDR) | <i>k</i> | <i>p</i> (unc) | <i>p</i> (FWE) | <i>p</i> (FDR) | <i>T</i> | <i>Z</i>             | <i>p</i> (unc) | <i>x</i> | <i>y</i> | <i>z</i> |
| .120     | 3        | <.001          | <.001          | 830      | <.001          | .078           | .205           | 5.35     | 4.59                 | <.001          | -4       | 34       | 34       |
|          |          |                |                |          |                | .117           | .205           | 5.19     | 4.48                 | <.001          | -22      | 38       | 46       |
|          |          |                |                |          |                | .887           | .910           | 4.01     | 3.64                 | <.001          | -6       | 38       | 44       |
|          |          | .295           | .354           | 101      | .037           | .480           | .719           | 4.53     | 4.02                 | <.001          | -38      | 14       | 54       |
|          |          |                |                |          |                | .998           | .910           | 3.54     | 3.27                 | .001           | -32      | 14       | 44       |
|          |          |                |                |          |                | .998           | .910           | 3.54     | 3.27                 | .001           | -44      | 16       | 46       |
|          |          | .668           | .744           | 53       | .118           | .810           | .910           | 4.13     | 3.73                 | <.001          | -36      | 52       | 12       |
